# Supplementary material
Source: PubMed Central journal article supplement (PMC6792461)
Supplement: ehp-127-097007-s001.pdf [file ehp-127-097007-s001.pdf]

**Note to readers with disabilities:** *EHP* strives to ensure that all journal content is accessible to all readers. However, some figures and Supplemental Material published in *EHP* articles may not conform to [508 standards](#) due to the complexity of the information being presented. If you need assistance accessing journal content, please contact [ehp508@niehs.nih.gov](mailto:ehp508@niehs.nih.gov). Our staff will work with you to assess and meet your accessibility needs within 3 working days.

### **Supplemental Material**

#### **The Role of Humidity in Associations of High Temperature with Mortality: A Multiauthor, Multicity Study**

Ben Armstrong, Francesco Sera, Ana Maria Vicedo-Cabrera, Rosana Abrutzky, Daniel Oudin Åström, Michelle L. Bell, Bing-Yu Chen, Micheline de Sousa Zanotti Stagliorio Coelho, Patricia Matus Correa, Tran Ngoc Dang, Magali Hurtado Diaz, Do Van Dung, Bertil Forsberg, Patrick Goodman, Yue-Liang Leon Guo, Yuming Guo, Masahiro Hashizume, Yasushi Honda, Ene Indermitte, Carmen Íñiguez, Haidong Kan, Ho Kim, Jan Kyselý, Eric Lavigne, Paola Michelozzi, Hans Orru, Nicolás Valdés Ortega, Mathilde Pascal, Martina S. Ragetti, Paulo Hilario Nascimento Saldiva, Joel Schwartz, Matteo Scortichini, Xerxes Seposo, Aurelio Tobias, Shilu Tong, Aleš Urban, César De la Cruz Valencia, Antonella Zanobetti, Ariana Zeka, and Antonio Gasparrini

#### **Table of Contents**

**Table S1.** Summary of data sources.

**Table S2.** Distribution of key variables by country: including dewpoint and specific humidity.

**Table S3.** Distribution of key variables by location.

**Table S4.** Further detail of model fit statistics summarised on Figure 1.

**Table S5.** Distribution of same and cross-lag correlations of daily temperature (T) and relative humidity (RH) measurements.

**Figure S1.** Detailed results replacing relative humidity by dewpoint or specific humidity.

**Figure S2.** Modification of Relative humidity (RH)-mortality association by temperature.

**Figure S3.** Mean temperature-mortality association adjusting for relative humidity (RH).

**Additional File-** SupplementalMaterial\_CodeAndData.zip

Table S1 Summary of data sources

| COUNTRY             | TYPE OF LOCATION | MORTALITY DATA                                                                          | METEOROLOGICAL DATA                                                                                                                                                                                                                                                                                                                                                                                                                                                                          |
|---------------------|------------------|-----------------------------------------------------------------------------------------|----------------------------------------------------------------------------------------------------------------------------------------------------------------------------------------------------------------------------------------------------------------------------------------------------------------------------------------------------------------------------------------------------------------------------------------------------------------------------------------------|
| Argentina           | City             | Non-external (Ministerio de Salud de la Nación)                                         | Weather station located within the location (Servicio Meteorológico Nacional)                                                                                                                                                                                                                                                                                                                                                                                                                |
| Australia           | City             | Non-external causes only (Australian Bureau of Statistics)                              | Met stations located within ≤30 km of each city's (Australian Bureau of Meteorology)                                                                                                                                                                                                                                                                                                                                                                                                         |
| Brazil              | City             | Non-external causes only (Ministry of Health)                                           | Met station located within the urban area (National Institute of Meteorology of Brazil)                                                                                                                                                                                                                                                                                                                                                                                                      |
| Canada              | City             | All causes (Canadian Mortality Database)                                                | Met station located closest to the location centre (Environment Canada)                                                                                                                                                                                                                                                                                                                                                                                                                      |
| Chile               | City             | All causes (Ministerio de Salud, Departamento de Estadísticas e Información de Salud)   | 11 stations (Ministerio del Medio Ambiente, Sistema de Información Nacional de Calidad del Aire)                                                                                                                                                                                                                                                                                                                                                                                             |
| China               | City             | Non-external (National Statics Office of China)                                         | Weather station located within each city. (China Meteorological Data Sharing Service System; <a href="http://data.cma.cn/">http://data.cma.cn/</a> )                                                                                                                                                                                                                                                                                                                                         |
| Czech Republic      | City (+1 region) | Czech Statistical Office and the Institute of Health Information and Statistics         | Airport station for cities, for the rural area, 4 stations (Czech Hydrometeorological Institute)                                                                                                                                                                                                                                                                                                                                                                                             |
| Estonia             | City             | All causes (Estonian Causes of Death Registry)                                          | Met station close to the city (Estonian Environment Agency)                                                                                                                                                                                                                                                                                                                                                                                                                                  |
| France              | City             | All causes(National Institute of Health and Medical Research - CepiDC)                  | Nearest station, usually the airport (Meteo France)                                                                                                                                                                                                                                                                                                                                                                                                                                          |
| Ireland (island of) | regions          | Non-external (Irish Central Statistics Office; Northern Ireland Social Research Agency) | Two weather stations for each of the four ROI regions and two weather stations for the two NI regions (Met Eireann, and the United Kingdom Meteorological Office for ROI and NI)                                                                                                                                                                                                                                                                                                             |
| Italy               | City             | All causes (Ministry of Health, Labour and Welfare)                                     | Airport monitoring station located closest to the city centre (Meteorological Service of the Italian Air Force)                                                                                                                                                                                                                                                                                                                                                                              |
| Japan               | prefecture       | All causes (Ministry of Health, Labour and Welfare)                                     | Weather station located within the urban area of the prefecture capital city (Japan Meteorology Agency)                                                                                                                                                                                                                                                                                                                                                                                      |
| South Korea         | City             | All causes (Korea Bureau of Statistics)                                                 | Weather station located within the location (Korea Meteorological Administration)                                                                                                                                                                                                                                                                                                                                                                                                            |
| Mexico              | City             | All causes (National Institute of Statistics, Geography and Informatics)                | Weather station located within the urban area or at a near airport (Primarily Servicio Meteorológico Nacional (SMN) Estaciones Sinópticas Meteorológicas (ESIMES), Estaciones Meteorológicas Automáticas (EMAS)* and Observatories. Otherwise (i) Instituto Nacional de Ecología y Cambio Climático (INECC). (ii) Red de Meteorología y Radiación Solar (REDMET) from the Sistema de Monitoreo Atmosférico de la Ciudad de México (SIMAT). (iii) WMO stations from the Weather Underground.) |
| Philippines         | City             | All causes (Philippine Statistics Authority - National Statistics Office)               | Station in or near location (Philippine Atmospheric Geophysical and Astronomical Services Administration)                                                                                                                                                                                                                                                                                                                                                                                    |
| Spain               | City             | All causes (Spain National Institute of Statistics)                                     | Weather station in the location or at a near airport (Spain National Meteorology Agency)                                                                                                                                                                                                                                                                                                                                                                                                     |
| Sweden              | City             | All causes (Swedish National Board of Health and Welfare)                               | Weather station in the location or at a near airport (Environment and Health Administration)                                                                                                                                                                                                                                                                                                                                                                                                 |

|                    |         |                                                                                     |                                                                                                                  |
|--------------------|---------|-------------------------------------------------------------------------------------|------------------------------------------------------------------------------------------------------------------|
| <i>Switzerland</i> | City    | All causes (Federal Office of Statistics)                                           | Weather station in the location or at a near airport (Federal Office of Meteorology and Climatology)             |
| <i>Taiwan</i>      | City    | Non-external (National Health Insurance Dataset)                                    | 1-15 stations/location (Taiwan Environmental Protection Administration)                                          |
| <i>Thailand</i>    | City    | Ministry of Public Health                                                           | (Meteorological Department, Ministry of Information and Communication Technology)                                |
| <i>UK</i>          | Regions | All causes (Office of National Statistics)                                          | 29 stations on average per location (British Atmospheric Data Centre)                                            |
| <i>USA</i>         | City    | Non-external (National Center for Health Statistics)                                | Weather station closest to the city centre (National Climatic Data Center)                                       |
| <i>Vietnam</i>     | City    | Non-external (Community health centers data from the A6 mortality reporting system) | Weather station at city airport (National Oceanic and Atmospheric Administration's National Climate Data Center) |

Meteorological data comprised means calculated in all except 4 countries from hourly measures. The exceptions were: Czech Rep: 7am, 2 and 9pm; Italy: 6-hourly; Thailand: min and max; UK: hourly for temperature; 9am and 3pm for RH.

Table S2 Distribution of key variables by country: including dewpoint and specific humidity

| Country     | Distribution of all humidity variables: mean(min,max) of location means |                   |                              | Mean (min,max) partial (w.r.t. temp) correlations between humidity variables |                  |                  |
|-------------|-------------------------------------------------------------------------|-------------------|------------------------------|------------------------------------------------------------------------------|------------------|------------------|
|             | Relative humidity (RH) (%)                                              | Dewpoint (DP, °C) | Specific humidity (SH, g/kg) | RH:DP                                                                        | RH:SH            | DP:SH            |
| Argentina   | 68.4 (67.5,69.9)                                                        | 11.9 (11.2,13.1)  | 17.1 (16.9,17.4)             | 0.99 (0.99,0.99)                                                             | 0.98 (0.98,0.98) | 0.99 (0.99,0.99) |
| Australia   | 69.0 (65.7,70.7)                                                        | 10.2 (8.5,11.4)   | 16.0 (13.1,18.4)             | 0.99 (0.98,0.99)                                                             | 0.98 (0.96,0.99) | 0.99 (0.99,0.99) |
| Brazil      | 78.0 (70.0,87.5)                                                        | 7.7 (5.1,12.3)    | 21.3 (17.1,24.2)             | 1.00 (0.99,1.00)                                                             | 1.00 (0.99,1.00) | 1.00 (0.99,1.00) |
| Canada      | 71.8 (62.8,81.8)                                                        | 10.8 (7.4,13.8)   | 11.7 (7.0,14.9)              | 0.99 (0.99,1.00)                                                             | 0.97 (0.96,0.99) | 0.98 (0.97,0.99) |
| Chile       | 67.9 (52.0,74.4)                                                        | 10.0 (8.2,11.0)   | 11.8 (10.4,13.8)             | 0.99 (0.98,1.00)                                                             | 0.98 (0.97,0.99) | 0.98 (0.97,0.99) |
| China       | 71.6 (60.1,80.4)                                                        | 11.4 (7.4,15.6)   | 19.1 (9.2,24.6)              | 0.99 (0.99,1.00)                                                             | 0.99 (0.98,0.99) | 0.99 (0.97,1.00) |
| Czech Rep   | 71.1 (67.1,73.8)                                                        | 11.6 (11.0,12.2)  | 11.8 (11.3,12.5)             | 0.99 (0.99,0.99)                                                             | 0.97 (0.97,0.97) | 0.99 (0.99,0.99) |
| Estonia     | 77.8 (77.7,78.0)                                                        | 9.5 (9.2,9.8)     | 11.5 (11.1,11.9)             | 1.00 (1.00,1.00)                                                             | 0.97 (0.97,0.97) | 0.98 (0.98,0.98) |
| France      | 70.1 (57.9,78.4)                                                        | 10.3 (8.8,15.5)   | 13.5 (12.3,16.3)             | 0.99 (0.99,1.00)                                                             | 0.98 (0.97,0.99) | 0.99 (0.99,0.99) |
| Ireland     | 82.2 (80.9,84.0)                                                        | 6.8 (5.7,8.4)     | 11.1 (10.9,11.8)             | 1.00 (1.00,1.00)                                                             | 0.99 (0.98,0.99) | 0.99 (0.99,0.99) |
| Italy       | 68.0 (58.9,77.8)                                                        | 11.3 (8.5,15.5)   | 16.6 (14.8,19.7)             | 0.99 (0.98,1.00)                                                             | 0.98 (0.97,0.99) | 0.99 (0.98,0.99) |
| Japan       | 75.2 (67.9,82.0)                                                        | 9.2 (6.7,11.5)    | 19.4 (14.5,23.9)             | 1.00 (0.99,1.00)                                                             | 0.98 (0.98,0.99) | 0.99 (0.98,0.99) |
| Mexico      | 64.6 (42.2,75.2)                                                        | 10.8 (7.3,17.0)   | 14.1 (9.4,19.5)              | 0.99 (0.99,1.00)                                                             | 0.99 (0.98,0.99) | 0.98 (0.98,0.99) |
| Philippines | 81.5 (78.5,82.8)                                                        | 5.1 (3.2,6.4)     | 25.0 (24.8,25.1)             | 0.98 (0.95,0.99)                                                             | 0.99 (0.98,1.00) | 0.99 (0.98,1.00) |
| South Korea | 74.4 (69.4,78.3)                                                        | 10.6 (9.7,11.7)   | 18.7 (18.0,19.3)             | 1.00 (1.00,1.00)                                                             | 1.00 (1.00,1.00) | 1.00 (1.00,1.00) |
| Spain       | 60.9 (42.5,82.9)                                                        | 11.1 (6.8,15.9)   | 13.8 (7.7,18.7)              | 0.99 (0.97,1.00)                                                             | 0.98 (0.97,0.99) | 0.99 (0.98,0.99) |
| Sweden      | 73.5 (70.5,77.2)                                                        | 9.3 (8.0,11.1)    | 11.1 (10.2,12.0)             | 0.99 (0.99,1.00)                                                             | 0.98 (0.97,0.98) | 0.99 (0.98,0.99) |
| Switzerland | 71.7 (67.7,75.2)                                                        | 10.4 (9.0,13.2)   | 12.5 (11.0,14.2)             | 1.00 (0.99,1.00)                                                             | 0.98 (0.98,0.98) | 0.99 (0.98,0.99) |
| Taiwan      | 76.7 (74.4,79.8)                                                        | 7.2 (6.4,8.2)     | 23.8 (23.4,24.7)             | 1.00 (0.98,1.00)                                                             | 1.00 (1.00,1.00) | 1.00 (0.99,1.00) |
| Thailand    | 79.6 (72.5,86.9)                                                        | 5.2 (3.7,7.5)     | 24.4 (23.1,25.6)             | 1.00 (1.00,1.00)                                                             | 0.99 (0.99,1.00) | 1.00 (1.00,1.00) |
| UK          | 69.2 (60.9,74.8)                                                        | 11.0 (9.5,12.2)   | 9.9 (8.5,11.1)               | 0.99 (0.99,1.00)                                                             | 0.98 (0.98,0.99) | 0.99 (0.99,0.99) |
| USA         | 67.1 (21.5,81.4)                                                        | 10.0 (4.9,15.4)   | 16.5 (5.0,23.2)              | 0.99 (0.96,1.00)                                                             | 0.98 (0.96,1.00) | 0.98 (0.96,1.00) |
| Vietnam     | 75.5 (72.1,78.8)                                                        | 9.7 (5.2,14.1)    | 23.7 (23.2,24.3)             | 0.99 (0.98,1.00)                                                             | 1.00 (1.00,1.00) | 0.99 (0.99,1.00) |
| All         | 70.7 (21.5,87.5)                                                        | 9.4 (3.2,17.0)    | 17.1 (5.0,25.6)              | 0.99 (0.95,1.00)                                                             | 0.98 (0.96,1.00) | 0.99 (0.96,1.00) |

Table S3 Distribution of key variables by location

| Country   | Location           | Period    | Total deaths (1000s) | Distribution of temperature and humidity: mean and standard deviations(SDs) across days |           |           |           |        |
|-----------|--------------------|-----------|----------------------|-----------------------------------------------------------------------------------------|-----------|-----------|-----------|--------|
|           |                    |           |                      | Temp. mean                                                                              | % missing | RH.% mean | % missing | RH% SD |
| Argentina | Cordoba            | 2005-2015 | 37                   | 23.6                                                                                    | 0         | 67.5      | 0         | 13.1   |
| Argentina | Buenos Aires       | 2005-2015 | 131                  | 23.6                                                                                    | 0         | 67.9      | 0         | 11.2   |
| Argentina | Rosario            | 2005-2015 | 38                   | 23.4                                                                                    | 0         | 70        | 0         | 11.4   |
| Australia | Brisbane           | 1988-2009 | 59                   | 24.2                                                                                    | 0         | 70.6      | 0         | 8.5    |
| Australia | Melbourne          | 1988-2009 | 140                  | 20.1                                                                                    | 0         | 65.7      | 0         | 11.4   |
| Australia | Sydney             | 1988-2009 | 161                  | 22.2                                                                                    | 0         | 70.7      | 0         | 10.7   |
| Brazil    | Belem              | 1997-2011 | 44                   | 26.5                                                                                    | 0.3       | 87.5      | 0.3       | 5.1    |
| Brazil    | Belo Horizonte     | 1997-2011 | 153                  | 23.5                                                                                    | 0.2       | 70        | 0.2       | 12.3   |
| Brazil    | Brasilia           | 1997-2011 | 37                   | 21.8                                                                                    | 0.2       | 75.8      | 0.3       | 11.4   |
| Brazil    | Cuiaba             | 1998-2011 | 13                   | 27.2                                                                                    | 15.2      | 80.8      | 14.9      | 7.4    |
| Brazil    | Curitiba           | 1997-2011 | 44                   | 20.8                                                                                    | 5.2       | 80.9      | 6.9       | 7.8    |
| Brazil    | Fortaleza          | 1997-2011 | 61                   | 27.4                                                                                    | 0.1       | 78.6      | 7.5       | 6.3    |
| Brazil    | Goiania            | 1997-2011 | 44                   | 24.7                                                                                    | 0.2       | 73.1      | 0.2       | 10.4   |
| Brazil    | Joao Pessoa        | 1997-2011 | 20                   | 28.1                                                                                    | 1         | 74.3      | 8.6       | 5.3    |
| Brazil    | Maceio             | 1997-2011 | 24                   | 26.2                                                                                    | 13.2      | 75.5      | 14        | 5.5    |
| Brazil    | Manaus             | 1997-2011 | 32                   | 26.6                                                                                    | 0.1       | 86.2      | 0.4       | 6.5    |
| Brazil    | Porto Alegre       | 1997-2011 | 63                   | 24.1                                                                                    | 5.2       | 74        | 5.2       | 8.8    |
| Brazil    | Recife             | 1997-2011 | 85                   | 27.2                                                                                    | 0.1       | 74.3      | 0.2       | 6.2    |
| Brazil    | Salvador           | 1997-2011 | 73                   | 27                                                                                      | 0.1       | 79.8      | 0.1       | 5.4    |
| Brazil    | Sao Luis           | 1997-2011 | 27                   | 26.9                                                                                    | 0         | 83.5      | 0         | 6      |
| Brazil    | Sao Paulo          | 1997-2011 | 279                  | 22.8                                                                                    | 0.4       | 75.4      | 1.2       | 9.6    |
| Brazil    | Teresina           | 1997-2011 | 19                   | 27                                                                                      | 4.3       | 79.5      | 12.3      | 9.7    |
| Brazil    | Vitoria            | 1997-2009 | 13                   | 26.8                                                                                    | 0.9       | 76.5      | 11.7      | 7.3    |
| Canada    | Abbotsford         | 1986-2009 | 8                    | 17                                                                                      | 0.6       | 71.9      | 0         | 8.8    |
| Canada    | Calgary            | 1986-2009 | 38                   | 14.4                                                                                    | 0.5       | 62.8      | 0         | 13.8   |
| Canada    | Edmonton           | 1986-2009 | 44                   | 15.4                                                                                    | 0.5       | 69.8      | 0         | 10.9   |
| Canada    | Halifax            | 1986-2009 | 21                   | 16.9                                                                                    | 0         | 78.1      | 0         | 12     |
| Canada    | Hamilton           | 1986-2009 | 33                   | 18.8                                                                                    | 0.1       | 70        | 0         | 11.5   |
| Canada    | Kingston           | 1986-2009 | 11                   | 18.8                                                                                    | 4         | 71.3      | 0.1       | 10.9   |
| Canada    | Kitchener-Waterloo | 1986-2009 | 20                   | 17.9                                                                                    | 0.1       | 70        | 0.2       | 11     |
| Canada    | London Ontario     | 1986-2009 | 28                   | 18.8                                                                                    | 0         | 73.9      | 0         | 9.8    |
| Canada    | Montreal           | 1986-1999 | 76                   | 18.6                                                                                    | 0.6       | 70.7      | 0         | 10.4   |
| Canada    | Ottawa             | 1986-2009 | 39                   | 18.6                                                                                    | 0.1       | 70.8      | 0         | 11.2   |
| Canada    | Regina             | 1986-2009 | 15                   | 16.2                                                                                    | 0.1       | 65.9      | 0         | 13     |
| Canada    | Saint John NB      | 1986-2009 | 12                   | 15.3                                                                                    | 1.4       | 78.6      | 0         | 11.3   |
| Canada    | Saskatoon          | 1986-2009 | 17                   | 15.8                                                                                    | 0.3       | 67.6      | 0.1       | 13.4   |
| Canada    | St. John's NFL     | 1986-2009 | 15                   | 13.9                                                                                    | 1.1       | 81.8      | 0         | 10.4   |
| Canada    | Sudbury            | 1986-2009 | 12                   | 16.7                                                                                    | 0.4       | 71.5      | 0         | 11.8   |
| Canada    | Thunder Bay        | 1986-2009 | 10                   | 15.3                                                                                    | 1.1       | 77        | 0         | 10     |

|            |                   |           |     |      |      |      |      |      |
|------------|-------------------|-----------|-----|------|------|------|------|------|
| Canada     | Toronto           | 1986-2009 | 196 | 19.4 | 0.5  | 69   | 0    | 10.8 |
| Canada     | Vancouver         | 1986-2009 | 93  | 16.8 | 0.3  | 74.6 | 0    | 7.4  |
| Canada     | Victoria          | 1986-2009 | 24  | 15.8 | 0.1  | 72.1 | 0    | 8.5  |
| Canada     | Windsor           | 1986-2009 | 18  | 21   | 0.7  | 69.1 | 0    | 10.2 |
| Canada     | Winnipeg          | 1986-2009 | 48  | 17.1 | 0.5  | 71.3 | 0    | 10.5 |
| Chile      | Chillan           | 2008-2013 | 1   | 18.6 | 17.7 | 74.4 | 29.2 | 10.3 |
| Chile      | Santiago          | 2008-2014 | 72  | 21   | 2.4  | 52   | 2    | 10.3 |
| Chile      | Temuco            | 2004-2013 | 4   | 15.5 | 5.9  | 72.8 | 7.4  | 8.2  |
| Chile      | Valparaiso        | 2004-2013 | 11  | 17.5 | 11.5 | 72.7 | 14.8 | 11   |
| China      | Anshan            | 2004-2006 | 9   | 24.2 | 0    | 65.3 | 0    | 12.4 |
| China      | Fuzhou            | 2004-2006 | 5   | 28   | 0    | 70.1 | 0    | 9.7  |
| China      | Hangzhou          | 2002-2004 | 5   | 26.7 | 5.2  | 74.6 | 5.2  | 12.4 |
| China      | Hong Kong         | 1996-2002 | 67  | 28.4 | 0    | 80.4 | 0    | 7.4  |
| China      | Lanzhou           | 2004-2008 | 11  | 17.6 | 0    | 60.1 | 0    | 15.1 |
| China      | Shanghai          | 2001-2004 | 51  | 27.1 | 0    | 75.7 | 0    | 8.4  |
| China      | Shenyang          | 2005-2008 | 30  | 21.6 | 0    | 75.4 | 0    | 10.1 |
| China      | Suzhu             | 2005-2008 | 15  | 27   | 0    | 79.5 | 0    | 8.1  |
| China      | Taiyuan           | 2004-2008 | 13  | 22   | 0    | 64.9 | 0    | 13.8 |
| China      | Tangshan          | 2006-2008 | 5   | 24.3 | 0    | 71.1 | 0    | 12.9 |
| China      | Tianjin           | 2005-2008 | 5   | 25.1 | 0    | 69.9 | 0    | 11.7 |
| China      | Wuhan             | 2003-2005 | 18  | 27.6 | 0    | 73.2 | 0    | 10.3 |
| China      | Xian              | 2004-2008 | 14  | 23.4 | 0    | 71.2 | 0    | 15.6 |
| Czech Rep. | Brno              | 1994-2015 | 28  | 18.5 | 0    | 67.1 | 0    | 12.2 |
| Czech Rep. | Ostrava           | 1994-2015 | 24  | 17.5 | 0    | 73.8 | 0    | 11.3 |
| Czech Rep. | Prague            | 1994-2015 | 91  | 16.9 | 0    | 70.7 | 0    | 11.7 |
| Czech Rep. | South Bohemia     | 1994-2015 | 81  | 16.4 | 0    | 72.7 | 0    | 11   |
| Estonia    | Kohtla-Järve linn | 1997-2015 | 5   | 15   | 0    | 78   | 0    | 9.7  |
| Estonia    | Narva linn        | 1997-2015 | 5   | 15   | 0    | 78   | 0    | 9.7  |
| Estonia    | Pärnu linn        | 1997-2015 | 4   | 15.9 | 0    | 77.7 | 0    | 9.2  |
| Estonia    | Tallinn           | 1997-2015 | 26  | 15.4 | 0    | 77.7 | 0    | 9.8  |
| Estonia    | Tartu linn        | 1997-2015 | 6   | 15.9 | 0    | 77.7 | 0    | 9.2  |
| France     | Bordeaux          | 2000-2010 | 17  | 20.2 | 0    | 69.8 | 0    | 10.3 |
| France     | Clermont-Ferrand  | 2000-2010 | 6   | 18.9 | 0    | 68.8 | 0    | 10.3 |
| France     | Dijon             | 2000-2010 | 6   | 18.8 | 0    | 70.2 | 0    | 11   |
| France     | Grenoble          | 2000-2010 | 10  | 19.9 | 0    | 73.5 | 0.1  | 9.2  |
| France     | Le Havre          | 2000-2010 | 8   | 16.9 | 0    | 78.4 | 0    | 9.6  |
| France     | Lens-Douai        | 2000-2010 | 11  | 17.3 | 0    | 75.2 | 0    | 9.4  |
| France     | Lille             | 2000-2010 | 28  | 17.3 | 0    | 75.2 | 0    | 9.4  |
| France     | Lyon              | 2000-2010 | 25  | 20.6 | 0    | 62.8 | 0    | 12.1 |
| France     | Marseille         | 2000-2010 | 29  | 23.2 | 0.1  | 57.9 | 0    | 10.4 |
| France     | Montpellier       | 2000-2010 | 9   | 22.6 | 0    | 61.6 | 0    | 15.5 |
| France     | Nancy             | 2000-2010 | 9   | 18.1 | 0    | 71.5 | 0    | 9.9  |
| France     | Nantes            | 2000-2010 | 14  | 18.4 | 0    | 74.2 | 0    | 10.7 |
| France     | Nice              | 2000-2010 | 16  | 22.9 | 0    | 67.3 | 0    | 9.5  |

|         |               |           |     |      |      |      |     |      |
|---------|---------------|-----------|-----|------|------|------|-----|------|
| France  | Paris         | 2000-2010 | 144 | 19.1 | 0    | 65.9 | 0.1 | 10.5 |
| France  | Rennes        | 2000-2010 | 5   | 18   | 0    | 74.1 | 0   | 8.8  |
| France  | Rouen         | 2000-2010 | 13  | 16.6 | 0.8  | 77.5 | 0.1 | 9.2  |
| France  | Strasbourg    | 2000-2010 | 11  | 18.6 | 0    | 72.4 | 0.2 | 9.5  |
| France  | Toulouse      | 2000-2010 | 16  | 21   | 0    | 64.9 | 0   | 11.1 |
| Ireland | E N Ireland   | 1984-2007 | 66  | 13.7 | 0    | 84   | 0   | 8.4  |
| Ireland | NE Irish rep. | 1984-2007 | 34  | 14.4 | 0    | 80.9 | 0   | 6.4  |
| Ireland | NW Irish Rep  | 1984-2007 | 22  | 13.8 | 0    | 82.9 | 0   | 5.7  |
| Ireland | SE Irish rep. | 1984-2007 | 74  | 14.2 | 0    | 81.1 | 0   | 6.4  |
| Ireland | SW Irish rep. | 1984-2007 | 81  | 14.6 | 0    | 83.1 | 0   | 6.1  |
| Ireland | W N Ireland   | 1984-2007 | 39  | 14.3 | 0    | 81.2 | 0   | 7.6  |
| Italy   | Bari          | 1996-2007 | 9   | 23.4 | 0.7  | 67.1 | 0.9 | 11.7 |
| Italy   | Bologna       | 1996-2010 | 17  | 23.8 | 1.1  | 61.3 | 1.1 | 12.9 |
| Italy   | Genoa         | 1999-2007 | 19  | 23.1 | 1.3  | 73.8 | 3.3 | 11.8 |
| Italy   | Palermo       | 1997-2001 | 8   | 24.9 | 1    | 58.9 | 1   | 12.8 |
| Italy   | Rome          | 1987-2010 | 158 | 23.2 | 0.2  | 68.7 | 0.2 | 10.8 |
| Italy   | Turin         | 1991-1999 | 20  | 20.6 | 0.4  | 75.8 | 0.4 | 10.3 |
| Italy   | Brescia       | 1993-2003 | 6   | 22.3 | 0.8  | 68.6 | 0.8 | 10.2 |
| Italy   | Civitavecchia | 1996-2006 | 1   | 23.9 | 1.9  | 77.8 | 1.9 | 8.5  |
| Italy   | Frosinone     | 1995-2006 | 1   | 23.4 | 2.7  | 66.3 | 2.7 | 9.7  |
| Italy   | Latina        | 1995-2006 | 2   | 23.6 | 0.6  | 74   | 1   | 9.1  |
| Italy   | Rieti         | 1995-2006 | 1   | 23.8 | 36.3 | 59.6 | 37  | 15.5 |
| Italy   | Viterbo       | 1995-2006 | 2   | 22.4 | 0.1  | 64.3 | 0.1 | 12   |
| Japan   | Fukuoka       | 1972-2012 | 434 | 25.6 | 0    | 73.7 | 0   | 9    |
| Japan   | Osaka         | 1972-2012 | 698 | 26.1 | 0    | 67.9 | 0   | 9.2  |
| Japan   | Tokyo         | 1972-2012 | 931 | 24.7 | 0    | 72   | 0.1 | 9.4  |
| Japan   | Aichi         | 1972-2012 | 507 | 25.1 | 0    | 72.3 | 0   | 10.8 |
| Japan   | Akita         | 1972-2012 | 138 | 21.8 | 0    | 76.6 | 0   | 9.1  |
| Japan   | Aomori        | 1972-2012 | 153 | 20.2 | 0.1  | 78.5 | 0.1 | 8.3  |
| Japan   | Chiba         | 1972-2012 | 397 | 24.1 | 0    | 78.2 | 0.1 | 8.1  |
| Japan   | Ehime         | 1972-2012 | 160 | 25.2 | 0    | 71.2 | 0.1 | 9.4  |
| Japan   | Fukui         | 1972-2012 | 81  | 24.3 | 0    | 74.8 | 0   | 9.1  |
| Japan   | Fukushima     | 1972-2012 | 210 | 22.6 | 0    | 75.4 | 0   | 10.2 |
| Japan   | Gifu          | 1972-2012 | 185 | 25.3 | 0    | 72   | 0   | 11   |
| Japan   | Gunma         | 1972-2012 | 182 | 23.8 | 0    | 73.5 | 0.1 | 11.5 |
| Japan   | Hiroshima     | 1972-2012 | 263 | 25.2 | 0.1  | 73.7 | 0.1 | 9.9  |
| Japan   | Hokkaido      | 1972-2012 | 522 | 19.4 | 0    | 74.2 | 0   | 9.1  |
| Japan   | Hyogo         | 1972-2012 | 477 | 25.3 | 0    | 72.6 | 0   | 9.7  |
| Japan   | Ibaraki       | 1972-2012 | 253 | 22.5 | 0    | 82   | 0   | 7.6  |
| Japan   | Ishikawa      | 1972-2012 | 110 | 24.1 | 0    | 74.3 | 0.1 | 9    |
| Japan   | Iwate         | 1972-2012 | 146 | 20.6 | 0.1  | 78.7 | 0.1 | 8.7  |
| Japan   | Kagawa        | 1972-2012 | 105 | 25.4 | 0    | 73.4 | 0   | 9.5  |
| Japan   | Kagoshima     | 1972-2012 | 204 | 26.5 | 0    | 75.2 | 0   | 8    |
| Japan   | Kanagawa      | 1972-2012 | 543 | 24.1 | 0    | 77.3 | 0.1 | 8.8  |

|             |                  |           |     |      |      |      |      |      |
|-------------|------------------|-----------|-----|------|------|------|------|------|
| Japan       | Kochi            | 1972-2012 | 99  | 25.4 | 0    | 76.5 | 0.1  | 9.3  |
| Japan       | Kumamoto         | 1972-2012 | 187 | 25.9 | 0    | 74.4 | 0    | 10   |
| Japan       | Kyoto            | 1972-2012 | 232 | 25.5 | 0.1  | 68.1 | 0.1  | 9.6  |
| Japan       | Mie              | 1972-2012 | 173 | 24.9 | 0    | 75.8 | 0    | 10.3 |
| Japan       | Miyagi           | 1972-2012 | 190 | 21.4 | 0    | 80.6 | 0    | 10.1 |
| Japan       | Miyazaki         | 1972-2012 | 115 | 25.6 | 0    | 79.7 | 0.1  | 8.2  |
| Japan       | Nagano           | 1972-2012 | 219 | 22.4 | 0    | 72.9 | 0    | 8.8  |
| Japan       | Nagasaki         | 1972-2012 | 162 | 25.5 | 0    | 76.9 | 0.1  | 9    |
| Japan       | Nara             | 1972-2012 | 116 | 24.3 | 0.1  | 76.1 | 0.1  | 9    |
| Japan       | Niigata          | 1972-2012 | 253 | 23.5 | 0    | 74.7 | 0.1  | 8.7  |
| Japan       | Oita             | 1972-2012 | 132 | 24.9 | 0    | 76.5 | 0    | 9.4  |
| Japan       | Okayama          | 1972-2012 | 193 | 25.5 | 0    | 72.1 | 0    | 9.9  |
| Japan       | Okinawa          | 1973-2012 | 88  | 27.9 | 0    | 79.3 | 0    | 6.7  |
| Japan       | Saga             | 1972-2012 | 91  | 25.6 | 0.1  | 75.1 | 0.2  | 10   |
| Japan       | Saitama          | 1972-2012 | 432 | 24.1 | 0    | 75.3 | 0.2  | 10.4 |
| Japan       | Shiga            | 1972-2012 | 105 | 24.3 | 0    | 75.5 | 0    | 8.3  |
| Japan       | Shimane          | 1972-2012 | 91  | 24   | 0    | 79.1 | 0.1  | 8.2  |
| Japan       | Shizuoka         | 1972-2012 | 312 | 24.7 | 0    | 76.4 | 0    | 8.4  |
| Japan       | Tochigi          | 1972-2012 | 176 | 23   | 0    | 78   | 0.1  | 8.7  |
| Japan       | Tokushima        | 1972-2012 | 92  | 25.3 | 0    | 73.9 | 0.1  | 9.6  |
| Japan       | Tottori          | 1972-2012 | 67  | 24.2 | 0    | 75.9 | 0    | 8.8  |
| Japan       | Toyama           | 1972-2012 | 116 | 23.6 | 0    | 79   | 0    | 9.3  |
| Japan       | Wakayama         | 1972-2012 | 119 | 25.6 | 0    | 71.8 | 0.1  | 8.8  |
| Japan       | Yamagata         | 1972-2012 | 136 | 22   | 0.1  | 75.7 | 0.1  | 9.2  |
| Japan       | Yamaguchi        | 1972-2012 | 171 | 24.7 | 0.1  | 76.1 | 0.1  | 8.6  |
| Japan       | Yamanashi        | 1972-2012 | 84  | 24.1 | 0    | 72.7 | 0.1  | 9.2  |
| Mexico      | Guadalajara      | 1998-2010 | 76  | 21.5 | 0.8  | 75.2 | 0.8  | 11.1 |
| Mexico      | Leon             | 1998-2014 | 33  | 21.5 | 1.3  | 64.1 | 1.2  | 14.2 |
| Mexico      | Ciudad Juarez    | 2002-2009 | 12  | 27.7 | 1.9  | 42.2 | 2    | 17   |
| Mexico      | Comarca Lagunera | 1998-2009 | 16  | 28.2 | 11.1 | 52.2 | 11.1 | 11.2 |
| Mexico      | Monterrey        | 2004-2009 | 32  | 27   | 0    | 64.5 | 0    | 10.1 |
| Mexico      | Puebla-Tlaxcala  | 1998-2009 | 39  | 17.6 | 1.5  | 69.8 | 1    | 8.7  |
| Mexico      | San Luis Potosi  | 1998-2010 | 5   | 20   | 4.2  | 68.9 | 33   | 9.1  |
| Mexico      | Tijuana          | 1998-2014 | 29  | 21.1 | 1.2  | 74.4 | 1.2  | 7.3  |
| Mexico      | Toluca de Lerdo  | 1998-2008 | 24  | 14.8 | 0.2  | 70.7 | 0.1  | 8.4  |
| Mexico      | Valley of Mexico | 1998-2014 | 459 | 17.3 | 0    | 63.5 | 2.2  | 10.7 |
| Philippines | Cebu             | 2006-2010 | 15  | 28.5 | 0    | 82.2 | 0    | 4.6  |
| Philippines | Davao            | 2006-2010 | 15  | 28.1 | 0    | 82.8 | 0    | 3.2  |
| Philippines | Manila           | 2006-2010 | 32  | 29   | 0    | 78.5 | 0    | 6    |
| Philippines | Quezon           | 2006-2010 | 31  | 28.4 | 0    | 82.5 | 0    | 6.4  |
| South Korea | Busan            | 1992-2010 | 108 | 23.4 | 0    | 78.3 | 0    | 10.8 |
| South Korea | Daegu            | 1992-2010 | 66  | 24.4 | 0    | 69.4 | 0    | 11   |
| South Korea | Daejeon          | 1992-2010 | 33  | 23.6 | 0    | 74.6 | 0    | 10.3 |
| South Korea | Gwangju          | 1992-2010 | 34  | 24.2 | 0    | 74.8 | 0    | 9.7  |



|             |                |           |     |      |     |      |     |      |
|-------------|----------------|-----------|-----|------|-----|------|-----|------|
| South Korea | Incheon        | 1992-2010 | 62  | 23   | 0   | 76.9 | 0   | 10.7 |
| South Korea | Seoul          | 1992-2010 | 227 | 23.7 | 0.1 | 71.7 | 0.1 | 11.7 |
| South Korea | Ulsan          | 1997-2010 | 18  | 23.6 | 0.1 | 75   | 0.1 | 10.2 |
| Spain       | Vitoria        | 1990-2014 | 12  | 18.1 | 0   | 75.1 | 0   | 8.8  |
| Spain       | A Coruna       | 1990-2014 | 16  | 18.9 | 0   | 77.8 | 0   | 7.9  |
| Spain       | Albacete       | 1990-2014 | 7   | 23.1 | 0   | 53.4 | 3.5 | 13.9 |
| Spain       | Alicante       | 1990-2014 | 18  | 24.8 | 0   | 68.8 | 0   | 10.2 |
| Spain       | Almeria        | 1990-2014 | 9   | 25.2 | 0.1 | 64.5 | 0.7 | 13.3 |
| Spain       | Avila          | 1990-2014 | 3   | 19   | 0   | 50.3 | 0   | 13.3 |
| Spain       | Badajoz        | 1990-2014 | 7   | 24.7 | 0   | 53   | 0   | 10.7 |
| Spain       | Barcelona      | 1990-2014 | 108 | 23.3 | 0   | 69   | 1.2 | 8.5  |
| Spain       | Bilbao         | 1990-2014 | 26  | 19.8 | 0   | 74.7 | 0   | 8.6  |
| Spain       | Burgos         | 1990-2014 | 11  | 18.1 | 0   | 64.6 | 0   | 10.7 |
| Spain       | Caceres        | 1990-2014 | 5   | 24.5 | 0   | 44.5 | 0   | 13.6 |
| Spain       | Cadiz          | 1990-2014 | 8   | 23.8 | 7.3 | 71.1 | 7.6 | 10.6 |
| Spain       | Castellon      | 1990-2014 | 9   | 24.4 | 0   | 67   | 0   | 10.3 |
| Spain       | Ceuta          | 2006-2014 | 1   | 23.8 | 0   | 68.7 | 5.6 | 15.9 |
| Spain       | Ciudad Real    | 1990-2014 | 4   | 24.7 | 0   | 45   | 0.3 | 12.5 |
| Spain       | Cordoba        | 1990-2014 | 18  | 26.4 | 0   | 46.9 | 0.1 | 12.6 |
| Spain       | Cuenca         | 1990-2014 | 3   | 21.7 | 0   | 49   | 0.5 | 13.2 |
| Spain       | Girona         | 1990-2014 | 5   | 22.1 | 0.3 | 68.2 | 0   | 10.6 |
| Spain       | Granada        | 1990-2014 | 15  | 23.7 | 0   | 47   | 0   | 11.6 |
| Spain       | Guadalajara    | 1990-2013 | 2   | 21.9 | 9.3 | 52   | 9.1 | 12.4 |
| Spain       | Huelva         | 1990-2014 | 8   | 24.6 | 0.1 | 59.5 | 0.1 | 12.3 |
| Spain       | Huesca         | 1990-2014 | 3   | 22.3 | 1.2 | 54.5 | 1.9 | 11.7 |
| Spain       | Jaen           | 1990-2014 | 6   | 25.2 | 2.2 | 45.9 | 3.6 | 12.9 |
| Spain       | Leon           | 1990-2013 | 9   | 18.2 | 0   | 58.6 | 0.7 | 11.1 |
| Spain       | Lleida         | 1990-2014 | 8   | 23.5 | 0   | 59.7 | 0   | 10.4 |
| Spain       | Logrono        | 1990-2014 | 8   | 21.4 | 0   | 62.1 | 0   | 10.5 |
| Spain       | Lugo           | 1990-2014 | 6   | 17.5 | 2   | 77.6 | 2   | 6.8  |
| Spain       | Madrid         | 1990-2014 | 195 | 23.7 | 0   | 45.8 | 0   | 11.5 |
| Spain       | Malaga         | 1990-2014 | 32  | 24.9 | 0   | 61.9 | 0   | 13.3 |
| Spain       | Melilla        | 1990-2014 | 3   | 24.6 | 0   | 70.3 | 0   | 13.5 |
| Spain       | Murcia         | 1990-2014 | 20  | 26.1 | 0   | 58.7 | 0   | 11   |
| Spain       | Ourense        | 1990-2014 | 7   | 21.5 | 0   | 64.2 | 0   | 8.3  |
| Spain       | Oviedo         | 1990-2014 | 15  | 18.1 | 0   | 81.5 | 0   | 7.9  |
| Spain       | Palma Mallorca | 1990-2014 | 21  | 23.7 | 0   | 68.5 | 0   | 9.2  |
| Spain       | Pamplona       | 1990-2014 | 12  | 20.1 | 0   | 62.9 | 0   | 10.2 |
| Spain       | Pontevedra     | 1990-2014 | 5   | 19.6 | 0   | 73.5 | 0.1 | 11.4 |
| Spain       | Salamanca      | 1990-2014 | 11  | 19.8 | 0   | 55.6 | 0   | 10.6 |
| Spain       | San Sebastian  | 1990-2014 | 13  | 18.5 | 0   | 82.9 | 0   | 10   |
| Spain       | Santander      | 1990-2014 | 13  | 19.3 | 0.2 | 77.7 | 0.2 | 7.4  |
| Spain       | Segovia        | 1990-2014 | 4   | 20.3 | 0   | 46.3 | 0   | 13.5 |
| Spain       | Sevilla        | 1990-2014 | 42  | 26.9 | 0   | 51.4 | 0   | 12.3 |

|             |                |           |     |      |      |      |      |      |
|-------------|----------------|-----------|-----|------|------|------|------|------|
| Spain       | Soria          | 1990-2014 | 2   | 18.7 | 1.6  | 57.5 | 1.8  | 12.2 |
| Spain       | Tarragona      | 1990-2014 | 7   | 25.1 | 0    | 64   | 0    | 12.7 |
| Spain       | Tenerife       | 1990-2014 | 12  | 24.7 | 0    | 62.1 | 0    | 7.9  |
| Spain       | Teruel         | 1990-2014 | 2   | 20.4 | 0    | 60.9 | 0    | 11.6 |
| Spain       | Toledo         | 1990-2014 | 4   | 24.8 | 0    | 42.5 | 0    | 13.3 |
| Spain       | Valencia       | 1990-2011 | 43  | 24.8 | 0    | 70   | 0.2  | 10.8 |
| Spain       | Valladolid     | 1990-2014 | 19  | 20.7 | 0    | 53.4 | 0.1  | 11.4 |
| Spain       | Zamora         | 1990-2014 | 5   | 21.1 | 0    | 53.3 | 0    | 10.7 |
| Spain       | Zaragoza       | 1990-2014 | 42  | 23.8 | 0    | 53.4 | 0    | 10.5 |
| Sweden      | Stockholm      | 1998-2005 | 19  | 15.8 | 3.7  | 70.5 | 4.6  | 11.1 |
| Sweden      | Gothenburg     | 1999-2005 | 10  | 16.3 | 12.5 | 72.7 | 14.6 | 8.8  |
| Sweden      | Skane          | 1998-2005 | 24  | 16.1 | 0.5  | 77.2 | 1.9  | 8    |
| Switzerland | Basel          | 1995-2013 | 12  | 18.2 | 0    | 72.4 | 0    | 9.5  |
| Switzerland | Bern           | 1995-2013 | 9   | 17   | 0    | 73.7 | 0    | 9    |
| Switzerland | Geneve         | 1995-2013 | 8   | 18.6 | 0    | 67.7 | 0    | 10   |
| Switzerland | Lausanne       | 1995-2013 | 6   | 18.7 | 0    | 67.8 | 0    | 10   |
| Switzerland | Lugano         | 1995-2013 | 9   | 20.6 | 0    | 68.3 | 0    | 13.2 |
| Switzerland | Luzern         | 1995-2013 | 5   | 17.5 | 0    | 75.2 | 0    | 9.8  |
| Switzerland | St. Gallen     | 1995-2013 | 4   | 15.8 | 0    | 74.5 | 0    | 11.3 |
| Switzerland | Zürich         | 1995-2013 | 23  | 17.1 | 0    | 74.2 | 0    | 10.8 |
| Taiwan      | Kaohsiung      | 1994-2007 | 69  | 28.6 | 0    | 79.8 | 0    | 6.4  |
| Taiwan      | Taichung       | 1994-2007 | 52  | 28.1 | 0    | 76   | 0    | 7    |
| Taiwan      | Taipei         | 1994-2007 | 124 | 28.5 | 0    | 74.4 | 0    | 8.2  |
| Thailand    | Amnat Charoen  | 1999-2008 | 3   | 27.3 | 7.1  | 86.5 | 0    | 4.5  |
| Thailand    | Ayutthaya      | 1999-2008 | 8   | 28.9 | 4.3  | 79.6 | 2.5  | 5    |
| Thailand    | Bangkok        | 1999-2008 | 72  | 29.6 | 2.5  | 73.2 | 8.2  | 5.4  |
| Thailand    | Buri Ram       | 1999-2008 | 4   | 28.1 | 20   | 80.9 | 0    | 5    |
| Thailand    | Chachoengsao   | 1999-2008 | 7   | 27.6 | 0    | 78.3 | 0    | 6.7  |
| Thailand    | Chaiyaphum     | 1999-2008 | 10  | 28.4 | 0    | 77.9 | 0    | 6.3  |
| Thailand    | Chanthaburi    | 1999-2008 | 7   | 27.9 | 0.4  | 78.9 | 0    | 4.8  |
| Thailand    | Chiang Mai     | 1999-2005 | 18  | 27.6 | 0    | 78.8 | 3.9  | 4.8  |
| Thailand    | Chiang Rai     | 1999-2008 | 17  | 27.1 | 4.7  | 82.3 | 2.5  | 4.8  |
| Thailand    | Chon Buri      | 2000-2008 | 13  | 28.8 | 19.8 | 77.4 | 2.5  | 4.9  |
| Thailand    | Chumphon       | 1999-2008 | 4   | 28.8 | 0    | 82.4 | 0    | 4.4  |
| Thailand    | Kalasin        | 1999-2008 | 10  | 28.7 | 0    | 80.6 | 0    | 6.7  |
| Thailand    | Kamphaeng Phet | 1999-2008 | 4   | 27.7 | 2.6  | 84   | 2.5  | 5.6  |
| Thailand    | Kanchanaburi   | 1999-2008 | 7   | 29.3 | 0    | 73.5 | 2.5  | 5.5  |
| Thailand    | Khon Kaen      | 1999-2008 | 20  | 28.2 | 1.2  | 79.1 | 1.6  | 6.2  |
| Thailand    | Krabi          | 1999-2008 | 2   | 27.9 | 13.5 | 86.9 | 2.7  | 4.4  |
| Thailand    | Lampang        | 1999-2008 | 13  | 28.6 | 0    | 83.9 | 0    | 5    |
| Thailand    | Lamphun        | 1999-2008 | 5   | 27.3 | 2.5  | 83.5 | 2.5  | 3.8  |
| Thailand    | Lop Buri       | 1999-2008 | 10  | 28   | 0    | 79.4 | 0.2  | 4.6  |
| Thailand    | Maha Sarakham  | 1999-2008 | 8   | 29.3 | 0    | 73.1 | 2.7  | 6.5  |
| Thailand    | Mukdahan       | 1999-2008 | 3   | 27.4 | 5.4  | 84.2 | 0    | 4.8  |

|          |                     |           |     |      |      |      |      |      |
|----------|---------------------|-----------|-----|------|------|------|------|------|
| Thailand | Nakhon Pathom       | 1999-2008 | 9   | 28.6 | 0    | 79   | 0    | 5.1  |
| Thailand | Nakhon Phanom       | 1999-2008 | 6   | 28.4 | 0    | 79.7 | 0    | 4.2  |
| Thailand | Nakhon Ratchasima   | 1999-2008 | 24  | 28.1 | 0    | 76.2 | 0.9  | 5.8  |
| Thailand | Nakhon Sawan        | 1999-2008 | 11  | 28.9 | 0    | 77.4 | 8.7  | 5.1  |
| Thailand | Nan                 | 1999-2008 | 6   | 28   | 0    | 79.3 | 0    | 6.7  |
| Thailand | Narathiwat          | 1999-2008 | 5   | 28.2 | 0    | 77.4 | 9.9  | 6.6  |
| Thailand | Nong Bua Lam Phu    | 1999-2008 | 4   | 28.9 | 0    | 81.1 | 0.1  | 5.3  |
| Thailand | Nong Khai           | 1999-2008 | 7   | 28.9 | 2.5  | 76.7 | 5.2  | 4.4  |
| Thailand | Nonthaburi          | 1999-2008 | 10  | 28.4 | 0    | 82.2 | 0    | 4.5  |
| Thailand | Pathum Thani        | 1999-2008 | 8   | 28.2 | 0    | 83.8 | 0    | 5.7  |
| Thailand | Pattani             | 2000-2008 | 4   | 27.7 | 19.6 | 85.1 | 0    | 4.9  |
| Thailand | Phayao              | 1999-2008 | 8   | 28.3 | 0    | 81.3 | 0    | 5    |
| Thailand | Phetchaburi         | 1999-2008 | 5   | 27.7 | 0    | 82.5 | 0    | 4.2  |
| Thailand | Phichit             | 1999-2008 | 4   | 28   | 0.4  | 81.8 | 7.5  | 3.7  |
| Thailand | Phitsanulok         | 1999-2008 | 10  | 28.8 | 0    | 75.3 | 2.5  | 5.5  |
| Thailand | Phrae               | 1999-2008 | 7   | 28.9 | 6.6  | 74   | 2.7  | 5.6  |
| Thailand | Prachin Buri        | 1999-2008 | 5   | 28.4 | 2.7  | 80.6 | 2.5  | 4.9  |
| Thailand | Prachuap Khiri Khan | 1999-2008 | 4   | 28.3 | 2.5  | 75.8 | 7.4  | 5.4  |
| Thailand | Ratchaburi          | 1999-2008 | 9   | 28   | 0    | 78.9 | 7.3  | 5.4  |
| Thailand | Rayong              | 1999-2008 | 6   | 26.4 | 0    | 82   | 2.5  | 4.6  |
| Thailand | Roi Et              | 1999-2008 | 12  | 28.3 | 3.3  | 78.7 | 4.8  | 5.6  |
| Thailand | Sa Kaeo             | 1999-2008 | 4   | 28.4 | 1.3  | 76.8 | 0.2  | 4.5  |
| Thailand | Sakon Nakhon        | 1999-2008 | 8   | 27.9 | 7.9  | 80.5 | 18.6 | 5.9  |
| Thailand | Samut Sakhon        | 1999-2008 | 5   | 29.1 | 3.3  | 76.8 | 0    | 5.7  |
| Thailand | Samutprakan         | 1999-2008 | 10  | 28.7 | 0    | 72.5 | 0    | 4.6  |
| Thailand | Saraburi            | 1999-2007 | 6   | 28.7 | 2.7  | 80.6 | 14.4 | 4.4  |
| Thailand | Si Sa Ket           | 1999-2008 | 12  | 28.3 | 1.4  | 77.9 | 3.4  | 5.9  |
| Thailand | Songkhla            | 1999-2008 | 7   | 28.3 | 0    | 78.7 | 0    | 4.3  |
| Thailand | Sukhothai           | 2000-2008 | 6   | 28.7 | 0    | 82.8 | 0    | 4.8  |
| Thailand | Suphanburi          | 1999-2008 | 7   | 28.7 | 2.7  | 75.5 | 10.1 | 5.8  |
| Thailand | Surat Thani         | 2003-2008 | 5   | 28.6 | 0    | 79.2 | 0    | 7.5  |
| Thailand | Surin               | 1999-2008 | 11  | 28.5 | 1.4  | 79.5 | 1.4  | 5    |
| Thailand | Tak                 | 1999-2008 | 3   | 28.4 | 12   | 77.7 | 20.1 | 5.2  |
| Thailand | Trang               | 1999-2008 | 5   | 29.1 | 0    | 77.7 | 2.5  | 4.6  |
| Thailand | Ubon Ratchathani    | 1999-2008 | 16  | 28.1 | 4.2  | 78.6 | 4.7  | 5.6  |
| Thailand | Udon Thani          | 1999-2008 | 16  | 28.4 | 0    | 80   | 0    | 6.6  |
| Thailand | Uttaradit           | 1999-2008 | 7   | 28.3 | 0    | 82.4 | 0    | 6.2  |
| Thailand | Yala                | 1999-2008 | 2   | 27.6 | 16.7 | 82.7 | 16.7 | 4.3  |
| Thailand | Yasothon            | 1999-2008 | 5   | 27.5 | 0    | 82.2 | 0    | 5.3  |
| UK       | East                | 1993-2006 | 226 | 16.3 | 0    | 68.2 | 0    | 10.5 |
| UK       | East Midlands       | 1993-2006 | 183 | 15.6 | 0    | 68.5 | 0    | 11.8 |
| UK       | London              | 1993-2006 | 256 | 17.5 | 0    | 60.9 | 0    | 12.2 |
| UK       | North East          | 1993-2006 | 123 | 14.6 | 0    | 68   | 0    | 11.9 |
| UK       | North West          | 1993-2006 | 323 | 15.4 | 0    | 70.5 | 0    | 11   |

|     |                           |           |     |      |     |      |     |      |
|-----|---------------------------|-----------|-----|------|-----|------|-----|------|
| UK  | South East                | 1993-2006 | 342 | 16.3 | 0   | 70.1 | 0   | 10.5 |
| UK  | South West                | 1993-2006 | 233 | 15.8 | 0   | 74.1 | 0   | 9.8  |
| UK  | Wales                     | 1993-2006 | 143 | 15.4 | 0   | 74.8 | 0   | 9.5  |
| UK  | West Midlands             | 1993-2006 | 233 | 15.6 | 0   | 66.9 | 0   | 11.8 |
| UK  | Yorkshire & Humber        | 1993-2006 | 225 | 15.3 | 0   | 69.5 | 0   | 11.1 |
| USA | Akron, OH                 | 1985-2006 | 33  | 20.3 | 0   | 72.2 | 0.1 | 10.1 |
| USA | Albuquerque, NM           | 1985-2006 | 22  | 23.8 | 0   | 37.3 | 0.1 | 14.1 |
| USA | Allentown-Bethlehem, PA   | 1985-2006 | 18  | 21.2 | 0   | 70.6 | 0.8 | 10.9 |
| USA | Atlanta, GA               | 1985-2006 | 96  | 25.4 | 0   | 67.9 | 0   | 10.6 |
| USA | Atlantic City, NJ         | 1985-2006 | 14  | 22.1 | 0   | 74.6 | 1.6 | 10.6 |
| USA | Austin, TX                | 1985-2006 | 21  | 28.4 | 0   | 62.4 | 1   | 10.4 |
| USA | Bakersfield, CA           | 1985-2006 | 26  | 26.4 | 0   | 39   | 1.4 | 9.1  |
| USA | Baltimore, MD             | 1985-2006 | 99  | 23.2 | 0   | 69.8 | 0.1 | 11.1 |
| USA | Barnstable-Yarmouth, MA   | 1997-2006 | 7   | 19.7 | 0.4 | 79.8 | 1.6 | 12.2 |
| USA | Baton Rouge, LA           | 1985-2006 | 19  | 27.2 | 0   | 73.1 | 0   | 7.8  |
| USA | Bergen-Passaic, NJ        | 1985-2006 | 73  | 23.4 | 0   | 64.4 | 0.1 | 13.1 |
| USA | Birmingham, AL            | 1985-2006 | 53  | 25.6 | 0   | 69.8 | 0.1 | 9.8  |
| USA | Boston, MA                | 1985-2006 | 145 | 20.9 | 0   | 69.1 | 0.1 | 13.7 |
| USA | Brownsville, TX           | 1985-2006 | 11  | 28.9 | 0   | 71.6 | 0.5 | 6.2  |
| USA | Buffalo, NY               | 1985-2006 | 66  | 19.8 | 0   | 70.2 | 0   | 10.2 |
| USA | Canton-Massillon, OH      | 1985-2006 | 24  | 20.3 | 0   | 72.2 | 0.1 | 10.1 |
| USA | Charleston, WV            | 1985-2006 | 15  | 22.3 | 0   | 73.4 | 0.3 | 9    |
| USA | Charlotte, NC             | 1985-2006 | 25  | 24.8 | 0   | 68.4 | 0   | 10.2 |
| USA | Chattanooga, TN           | 1985-2006 | 19  | 25   | 0   | 70.1 | 0.2 | 8.9  |
| USA | Chicago, IL               | 1985-2006 | 347 | 21.1 | 0   | 68.9 | 0   | 10.9 |
| USA | Cincinnati, OH            | 1999-2006 | 18  | 22.4 | 0   | 73.6 | 0.8 | 9    |
| USA | Cleveland, OH             | 1985-2006 | 125 | 20.7 | 0   | 71.2 | 0   | 9.4  |
| USA | Columbia, SC              | 1985-2006 | 24  | 26.2 | 0   | 67.8 | 0   | 9.4  |
| USA | Columbus, OH              | 1985-2006 | 49  | 22   | 0   | 68.4 | 0.2 | 9.8  |
| USA | Dallas, TX                | 1985-2006 | 82  | 28.1 | 0   | 59.9 | 0   | 11.4 |
| USA | Dayton, OH                | 1985-2006 | 33  | 21.6 | 0   | 68.9 | 0.3 | 10.4 |
| USA | Daytona Beach, FL         | 1985-2006 | 33  | 27.1 | 0   | 75.9 | 0.4 | 6    |
| USA | Denver, CO                | 1985-2006 | 56  | 20.7 | 0   | 45.1 | 0.1 | 15.4 |
| USA | Des Moines, IA            | 1985-2006 | 17  | 22   | 0   | 69.1 | 0.2 | 10.4 |
| USA | Detroit, MI               | 1985-2006 | 227 | 21   | 0   | 68.3 | 0.2 | 10   |
| USA | Dutchess County, NY       | 1985-2006 | 12  | 20.1 | 4.3 | 71.1 | 4.3 | 12.4 |
| USA | El Paso, TX               | 1985-2006 | 22  | 26.8 | 0   | 40.6 | 0   | 14.9 |
| USA | Erie, PA                  | 1985-2006 | 16  | 20.3 | 0   | 71.5 | 0.8 | 9.8  |
| USA | Flint, MI                 | 1985-2006 | 24  | 19.6 | 0   | 72.1 | 0.1 | 9.9  |
| USA | Fort Myers-Cape Coral, FL | 1985-2006 | 23  | 28.2 | 0.1 | 73.2 | 2   | 6.2  |

|     |                                    |           |     |      |     |      |      |      |
|-----|------------------------------------|-----------|-----|------|-----|------|------|------|
| USA | Fort Pierce-Port St. Lucie, FL     | 1985-2006 | 15  | 27.2 | 0   | 77.2 | 7.4  | 5.3  |
| USA | Fort Worth-Arlington, TX           | 1999-2006 | 21  | 28.2 | 0   | 57.2 | 0.8  | 12.1 |
| USA | Fresno, CA                         | 1985-2006 | 30  | 26.2 | 0   | 40.4 | 1.4  | 8.3  |
| USA | Ft. Lauderdale, FL                 | 1985-2006 | 72  | 27.4 | 0   | 76.6 | 7.4  | 4.9  |
| USA | Galveston, TX                      | 1991-2006 | 10  | 27.1 | 1.6 | 74.3 | 1.6  | 8.8  |
| USA | Gary, IN                           | 1985-2006 | 28  | 20.9 | 0   | 69.7 | 0    | 11.5 |
| USA | Grand Rapids, MI                   | 1985-2006 | 24  | 19.9 | 0   | 71.1 | 0.1  | 10.5 |
| USA | Greensboro, NC                     | 1985-2006 | 20  | 23.7 | 0   | 70.9 | 0    | 9.8  |
| USA | Greenville, SC                     | 1985-2006 | 18  | 24.5 | 0   | 69.9 | 0.2  | 10.3 |
| USA | Hamilton, OH                       | 1999-2006 | 6   | 22.4 | 0   | 73.6 | 0.8  | 9    |
| USA | Harrisburg-Carlisle, PA            | 1992-2006 | 7   | 22.6 | 0   | 71.2 | 7.9  | 10.9 |
| USA | Hartford, CT                       | 1985-2006 | 47  | 20.8 | 0   | 69.5 | 0.6  | 11.4 |
| USA | Honolulu, HI                       | 1985-2000 | 24  | 27.5 | 0   | 62.8 | 0.1  | 5.2  |
| USA | Houston, TX                        | 1985-2006 | 116 | 28   | 0   | 70   | 0    | 8.5  |
| USA | Indianapolis, IN                   | 1985-2006 | 47  | 22.2 | 0   | 70.5 | 0    | 10.2 |
| USA | Jacksonville, FL                   | 1985-2006 | 39  | 27   | 0   | 74.8 | 0.1  | 6.7  |
| USA | Jersey City, NJ                    | 1985-2006 | 32  | 23.4 | 0   | 64.4 | 0.1  | 13.1 |
| USA | Kansas City, MO-KS                 | 1985-2006 | 67  | 23.4 | 0   | 69.7 | 0.1  | 10.9 |
| USA | Knoxville, TN                      | 1985-2006 | 25  | 24.1 | 0   | 71   | 0.1  | 8.9  |
| USA | Lakeland-Winter Haven, FL          | 1985-2006 | 29  | 27.9 | 1.6 | 74   | 1.6  | 6.3  |
| USA | Lancaster, PA                      | 1992-2006 | 12  | 21.9 | 0   | 74.1 | 7.9  | 11.4 |
| USA | Lansing, MI                        | 1985-2006 | 11  | 19.4 | 0   | 72.6 | 0.3  | 10.1 |
| USA | Las Vegas, NV-AZ                   | 1985-2006 | 56  | 30.7 | 0   | 21.5 | 0.3  | 10.4 |
| USA | Little Rock, AR                    | 1985-2006 | 17  | 26.3 | 0   | 68.3 | 3.8  | 9.7  |
| USA | Los Angeles, CA                    | 1985-2006 | 380 | 20.4 | 0   | 74.2 | 0.3  | 6.9  |
| USA | Louisville, KY                     | 1985-2006 | 42  | 24.2 | 0.2 | 67.7 | 0.4  | 9.8  |
| USA | Lubbock, TX                        | 1985-2006 | 11  | 25.3 | 0   | 53.8 | 0.1  | 14.4 |
| USA | Madison, WI                        | 1985-2006 | 15  | 19.7 | 0   | 72.2 | 0.1  | 9.9  |
| USA | McAllen-Edinburg-Mission, TX       | 1999-2006 | 7   | 29.9 | 0   | 63.5 | 1.1  | 8.1  |
| USA | Melbourne- Titusville-Palm Bay, FL | 1985-2006 | 19  | 27.1 | 2.9 | 77.8 | 10.2 | 5.2  |
| USA | Memphis, TN                        | 1985-2006 | 47  | 26.5 | 0   | 65.8 | 1.2  | 9.8  |
| USA | Miami, FL                          | 1985-2006 | 119 | 28.5 | 0   | 73.2 | 0    | 5.9  |
| USA | Middlesex, NJ                      | 1985-2006 | 33  | 21.8 | 1.1 | 71   | 1.2  | 14.6 |
| USA | Milwaukee, WI                      | 1985-2006 | 72  | 20.3 | 0   | 70.7 | 0    | 11.3 |
| USA | Minneapolis-St. Paul, MN           | 1985-2006 | 74  | 20.4 | 0   | 66.8 | 0    | 11.2 |
| USA | Mobile, AL                         | 1985-2006 | 23  | 26.8 | 0   | 73.1 | 0.2  | 8.2  |
| USA | Monmouth-Ocean, NJ                 | 1992-2006 | 40  | 21.7 | 7.6 | 66.8 | 13.3 | 12.1 |
| USA | Myrtle Beach, SC                   | 1985-2006 | 8   | 25.6 | 5.9 | 75.8 | 6.4  | 8.6  |

|     |                                      |           |     |      |     |      |      |      |
|-----|--------------------------------------|-----------|-----|------|-----|------|------|------|
| USA | Naples, FL                           | 1985-2006 | 9   | 28.1 | 5.1 | 73.8 | 6.9  | 5.5  |
| USA | Nashua, NH                           | 1985-2006 | 14  | 19.4 | 6.1 | 69   | 6.5  | 12.5 |
| USA | Nashville, TN                        | 1985-2006 | 30  | 24.9 | 0   | 67.9 | 0    | 9.4  |
| USA | Nassau-Suffolk, NY                   | 1985-2006 | 120 | 21.2 | 0   | 74   | 7.6  | 11.9 |
| USA | New Haven-Meriden, CT                | 1985-2006 | 47  | 20.8 | 0   | 69.5 | 0.6  | 11.4 |
| USA | New London, CT                       | 1985-2006 | 11  | 20.7 | 1.6 | 70.2 | 2.2  | 12.8 |
| USA | New York, NY                         | 1985-2006 | 425 | 23.4 | 0   | 64.5 | 0    | 13   |
| USA | Newark, NJ                           | 1985-2006 | 68  | 23.4 | 0   | 64.4 | 0.1  | 13.1 |
| USA | Newburgh, NY                         | 1985-2006 | 15  | 20.5 | 0.3 | 70.4 | 0.9  | 11.4 |
| USA | Oakland, CA                          | 1985-2006 | 84  | 18.1 | 9.5 | 67.3 | 9.6  | 9    |
| USA | Ocala, FL                            | 1985-2006 | 17  | 27.2 | 0.6 | 73.1 | 0.9  | 6.4  |
| USA | Oklahoma City, OK                    | 1985-2006 | 36  | 25.8 | 0   | 63.3 | 0.2  | 11.9 |
| USA | Omaha, NE                            | 1985-2006 | 22  | 22.3 | 0   | 69.4 | 0.1  | 10.5 |
| USA | Orange County, CA                    | 1985-2006 | 96  | 22.3 | 0   | 65.7 | 2.5  | 7.8  |
| USA | Orlando, FL                          | 1985-2006 | 49  | 27.8 | 0   | 73.2 | 0.2  | 6    |
| USA | Pensacola, FL                        | 1985-2006 | 14  | 27.3 | 0   | 73.8 | 4.6  | 9    |
| USA | Philadelphia, PA-NJ                  | 1985-2006 | 280 | 23.6 | 0   | 66.9 | 0    | 11.6 |
| USA | Phoenix, AZ                          | 1985-2006 | 118 | 33.2 | 0   | 27.3 | 0    | 12   |
| USA | Pittsburgh, PA                       | 1985-2006 | 97  | 20.9 | 0   | 69.7 | 0.1  | 10.4 |
| USA | Portland, ME                         | 1985-2006 | 14  | 18.5 | 0   | 73.7 | 0.4  | 12.2 |
| USA | Portland, OR                         | 1985-2006 | 65  | 19.4 | 0   | 61.9 | 0.2  | 10.4 |
| USA | Providence-Fall River, RI-MA         | 1985-2006 | 11  | 20.9 | 0.1 | 71.5 | 0.3  | 12.6 |
| USA | Punta Gorda, FL                      | 1985-2006 | 10  | 28.1 | 1.3 | 73.9 | 3.1  | 5.6  |
| USA | Raleigh, NC                          | 1985-2006 | 18  | 24.5 | 0   | 71.6 | 0.1  | 9.2  |
| USA | Reading, PA                          | 1985-2006 | 22  | 24.5 | 0   | 71.6 | 0.1  | 9.2  |
| USA | Riverside-San Bernardino, CA         | 1998-2006 | 55  | 25.3 | 0.2 | 49.4 | 7.8  | 10   |
| USA | Rochester, NY                        | 1985-2006 | 40  | 19.6 | 0   | 72.1 | 0.1  | 9.7  |
| USA | Rockford, IL                         | 1985-2006 | 14  | 20.7 | 0   | 70.6 | 0.2  | 10.5 |
| USA | Sacramento, CA                       | 1985-2006 | 47  | 23   | 0   | 50.3 | 6.4  | 9.7  |
| USA | Saginaw, MI                          | 1985-2006 | 12  | 19.6 | 0.8 | 70.6 | 0.8  | 10.8 |
| USA | Salinas, CA                          | 1998-2006 | 4   | 17.1 | 0   | 70.7 | 20.8 | 8.3  |
| USA | Salt Lake City, UT                   | 1985-2006 | 27  | 22.8 | 0   | 37   | 0.4  | 12.3 |
| USA | San Antonio, TX                      | 1985-2006 | 58  | 28.4 | 0   | 61.7 | 0    | 9.8  |
| USA | San Diego, CA                        | 1985-2006 | 115 | 20.9 | 0   | 73.5 | 0    | 6.5  |
| USA | San Francisco, CA                    | 1985-2006 | 77  | 17.6 | 0   | 69.4 | 0.1  | 8.1  |
| USA | San Jose, CA                         | 1985-2006 | 50  | 21   | 3.3 | 56.2 | 3.4  | 8.1  |
| USA | Sarasota-Bradenton, FL               | 1985-2006 | 38  | 28   | 2.9 | 73.6 | 2.9  | 6    |
| USA | Scranton--Wilkes-Barre--Hazleton, PA | 1985-2006 | 45  | 20   | 0   | 70.9 | 0.7  | 10.9 |
| USA | Seattle, WA                          | 1985-2006 | 70  | 17.5 | 0   | 66.4 | 0    | 10.8 |
| USA | Shreveport, LA                       | 1985-2006 | 16  | 27.2 | 0   | 67.4 | 0.1  | 9.8  |
| USA | Spokane, WA                          | 1985-2006 | 21  | 18.3 | 0   | 46.8 | 0.2  | 14.4 |

|         |                                     |           |    |      |     |      |      |      |
|---------|-------------------------------------|-----------|----|------|-----|------|------|------|
| USA     | Springfield, MA                     | 1985-2006 | 28 | 20.8 | 0   | 69.5 | 0.6  | 11.4 |
| USA     | St. Louis, MO-IL                    | 1985-2006 | 96 | 24.5 | 0   | 65.5 | 0.2  | 10.7 |
| USA     | Stamford-Norwalk, CT                | 1985-2006 | 42 | 21.4 | 0   | 71.6 | 0.7  | 12.3 |
| USA     | Stockton-Lodi, CA                   | 1985-2006 | 17 | 23.6 | 0   | 48.1 | 12.5 | 10.1 |
| USA     | Syracuse, NY                        | 1985-2006 | 26 | 19.8 | 0   | 71.1 | 0.2  | 9.4  |
| USA     | Tacoma, WA                          | 1985-2006 | 26 | 17.8 | 8.1 | 64.9 | 8.1  | 8.8  |
| USA     | Tampa-St. Petersburg-Clearwater, FL | 1985-2006 | 50 | 28   | 0   | 73.7 | 0    | 6.1  |
| USA     | Toledo, OH                          | 1985-2006 | 28 | 20.8 | 0   | 70.4 | 0.8  | 10.2 |
| USA     | Trenton, NJ                         | 1985-2006 | 18 | 21.6 | 0   | 75.3 | 0    | 13.8 |
| USA     | Tucson, AZ                          | 1985-2006 | 39 | 29.5 | 0   | 33.7 | 0.5  | 14.7 |
| USA     | Tulsa, OK                           | 1985-2006 | 30 | 26.1 | 0   | 64.7 | 0.1  | 11.2 |
| USA     | Utica-Rome, NY                      | 2001-2006 | 4  | 19.3 | 0   | 74.6 | 1    | 8.9  |
| USA     | Ventura County, CA                  | 1985-2006 | 25 | 18.9 | 4.5 | 81.4 | 4.8  | 6.9  |
| USA     | Virginia Beach, VA                  | 1985-2006 | 57 | 24.9 | 0   | 72.2 | 0.3  | 9.6  |
| USA     | Washington, DC-MD-VA                | 1985-2006 | 44 | 24.4 | 0   | 67.2 | 0.2  | 11.3 |
| USA     | West Palm Beach-Boca Raton, FL      | 1985-2006 | 72 | 28   | 0   | 75.2 | 0.1  | 5.1  |
| USA     | Wichita, KS                         | 1985-2006 | 21 | 24.9 | 0   | 62.6 | 0    | 12.4 |
| USA     | Wilmington, DE                      | 1985-2006 | 23 | 22.8 | 0   | 70.9 | 0.8  | 11.1 |
| USA     | Worcester, MA                       | 1985-2006 | 38 | 19   | 0.1 | 71.2 | 2.6  | 13.1 |
| USA     | York, PA                            | 1992-2006 | 9  | 22.1 | 0   | 73.3 | 7.9  | 10.4 |
| USA     | Youngstown-Warren, OH               | 1985-2006 | 26 | 19.6 | 0   | 73.7 | 0.1  | 9.9  |
| Vietnam | Ho Chi Minh City                    | 2010-2013 | 34 | 28.4 | 0   | 78.8 | 0    | 5.2  |
| Vietnam | Hue                                 | 2009-2013 | 2  | 29.1 | 1.1 | 72.1 | 1.1  | 14.1 |

|           |                |           |     |      |      |      |      |      |
|-----------|----------------|-----------|-----|------|------|------|------|------|
| Argentina | Cordoba        | 2005-2015 | 37  | 23.6 | 0    | 67.5 | 0    | 13.1 |
| Argentina | Buenos Aires   | 2005-2015 | 131 | 23.6 | 0    | 67.9 | 0    | 11.2 |
| Argentina | Rosario        | 2005-2015 | 38  | 23.4 | 0    | 70   | 0    | 11.4 |
| Australia | Brisbane       | 1988-2009 | 59  | 24.2 | 0    | 70.6 | 0    | 8.5  |
| Australia | Melbourn       | 1988-2009 | 140 | 20.1 | 0    | 65.7 | 0    | 11.4 |
| Australia | Sydney         | 1988-2009 | 161 | 22.2 | 0    | 70.7 | 0    | 10.7 |
| Brazil    | Belem          | 1997-2011 | 44  | 26.5 | 0.3  | 87.5 | 0.3  | 5.1  |
| Brazil    | Belo Horizonte | 1997-2011 | 153 | 23.5 | 0.2  | 70   | 0.2  | 12.3 |
| Brazil    | Brasilia       | 1997-2011 | 37  | 21.8 | 0.2  | 75.8 | 0.3  | 11.4 |
| Brazil    | Cuiaba         | 1998-2011 | 13  | 27.2 | 15.2 | 80.8 | 14.9 | 7.4  |
| Brazil    | Curitiba       | 1997-2011 | 44  | 20.8 | 5.2  | 80.9 | 6.9  | 7.8  |
| Brazil    | Fortaleza      | 1997-2011 | 61  | 27.4 | 0.1  | 78.6 | 7.5  | 6.3  |
| Brazil    | Goiania        | 1997-2011 | 44  | 24.7 | 0.2  | 73.1 | 0.2  | 10.4 |
| Brazil    | Joao Pessoa    | 1997-2011 | 20  | 28.1 | 1    | 74.3 | 8.6  | 5.3  |
| Brazil    | Maceio         | 1997-2011 | 24  | 26.2 | 13.2 | 75.5 | 14   | 5.5  |
| Brazil    | Manaus         | 1997-2011 | 32  | 26.6 | 0.1  | 86.2 | 0.4  | 6.5  |
| Brazil    | Porto Alegre   | 1997-2011 | 63  | 24.1 | 5.2  | 74   | 5.2  | 8.8  |
| Brazil    | Recife         | 1997-2011 | 85  | 27.2 | 0.1  | 74.3 | 0.2  | 6.2  |
| Brazil    | Salvador       | 1997-2011 | 73  | 27   | 0.1  | 79.8 | 0.1  | 5.4  |
| Brazil    | Sao Luis       | 1997-2011 | 27  | 26.9 | 0    | 83.5 | 0    | 6    |
| Brazil    | Sao Paulo      | 1997-2011 | 279 | 22.8 | 0.4  | 75.4 | 1.2  | 9.6  |
| Brazil    | Teresina       | 1997-2011 | 19  | 27   | 4.3  | 79.5 | 12.3 | 9.7  |
| Brazil    | Vitoria        | 1997-2009 | 13  | 26.8 | 0.9  | 76.5 | 11.7 | 7.3  |
| Canada    | Abbotsford     | 1986-2009 | 8   | 17   | 0.6  | 71.9 | 0    | 8.8  |
| Canada    | Calgary        | 1986-2009 | 38  | 14.4 | 0.5  | 62.8 | 0    | 13.8 |
| Canada    | Edmonton       | 1986-2009 | 44  | 15.4 | 0.5  | 69.8 | 0    | 10.9 |
| Canada    | Halifax        | 1986-2009 | 21  | 16.9 | 0    | 78.1 | 0    | 12   |
| Canada    | Hamilton       | 1986-2009 | 33  | 18.8 | 0.1  | 70   | 0    | 11.5 |
| Canada    | Kingston       | 1986-2009 | 11  | 18.8 | 4    | 71.3 | 0.1  | 10.9 |
| Canada    | Kitchener      | 1986-2009 | 20  | 17.9 | 0.1  | 70   | 0.2  | 11   |
| Canada    | London Ontario | 1986-2009 | 28  | 18.8 | 0    | 73.9 | 0    | 9.8  |
| Canada    | Montreal       | 1986-1999 | 76  | 18.6 | 0.6  | 70.7 | 0    | 10.4 |
| Canada    | Ottawa         | 1986-2009 | 39  | 18.6 | 0.1  | 70.8 | 0    | 11.2 |
| Canada    | Regina         | 1986-2009 | 15  | 16.2 | 0.1  | 65.9 | 0    | 13   |
| Canada    | Saint John's   | 1986-2009 | 12  | 15.3 | 1.4  | 78.6 | 0    | 11.3 |



Table S4. Further detail of model fit statistics summarised on Figure 1.

| Name on Figure     | Weather variables |          | Functional form of variable 2 | df of weather terms | deviance (mean) | qAIC (mean) |
|--------------------|-------------------|----------|-------------------------------|---------------------|-----------------|-------------|
|                    | 1*                | 2        |                               |                     |                 |             |
| 1 Null             |                   | 0        |                               | 0                   | 2464            | 2653.6      |
| 2 RH               | RH                |          |                               | 12                  | 2432            | 2645.3      |
| 3 Dewpoint         | dewpoint          |          |                               | 12                  | 2424.4          | 2636.7      |
| 4 Temperature      | tmean             |          |                               | 12                  | 2387.1          | 2595.9      |
| 5 App temp         | app temp          |          |                               | 12                  | 2389.3          | 2598.3      |
| 6 RH A             | tmean             | RH       | linear                        | 15                  | 2379.4          | 2593.6      |
| 7 RH B             | tmean             | RH       | quadratic                     | 18                  | 2375.9          | 2596.4      |
| 8 RH C             | tmean             | RH       | cubic                         | 21                  | 2372.2          | 2598.7      |
| 9 Dewpoint A       | tmean             | dewpoint | linear                        | 15                  | 2379.5          | 2593.7      |
| 10 Dewpoint B      | tmean             | dewpoint | quadratic                     | 18                  | 2375.5          | 2595.8      |
| 11 Dewpoint C      | tmean             | dewpoint | cubic                         | 21                  | 2371.3          | 2597.5      |
| Interaction models |                   |          |                               |                     |                 |             |
| 12 linear          | tmean             | RH       | linear                        | 18                  | 2374.9          | 2594.9      |
| 13 3groups A       | tmean             | RH       | linear                        | 21                  | 2372.4          | 2599.1      |
| 14 3groups B       | tmean             | RH       | linear                        | 21                  | 2372.2          | 2598.8      |
| 15 3groups C       | tmean             | RH       | linear                        | 21                  | 2371.3          | 2597.8      |
| 16 3groups D       | tmean             | RH       | linear                        | 21                  | 2373.2          | 2597.8      |
| 17 3groups E       | tmean             | RH       | linear                        | 21                  | 2371.5          | 2596.4      |
| 18 3groups F       | tmean             | RH       | linear                        | 21                  | 2372            | 2597        |

Notes: Abbreviations: RH=relative humidity, temp=temperature, app temp=apparent temperature, qAIC=quasi Akaike Information Criterion. All weather terms are included as distributed lag linear models (DLNMs) with stratified lag structure over lags 0,1,2-3. The first weather variable listed is included in all models as a 4df natural cubic spline. All models from 6 include temperature (4 df natural cubic spline) plus a range of humidity terms. Models 6-8 include RH as linear(A), quadratic(B) and cubic (C) polynomials, and 9-11 the same for dewpoint. Models 12-18 include, in addition to a linear term for RH, a range of forms of interaction between temperature (temp) and linear RH: linear temperature (12); separate RH slopes for each of three groups of temperature with cutpoints defined by location-specific (13-15) and global (16-18) percentiles.

Table S5: Distribution of same and cross-lag correlations of daily temperature (T) and relative humidity (RH) measurements.

|      | correlation of TI0 with: |        |        | correlation of RH10 with: |        |        |
|------|--------------------------|--------|--------|---------------------------|--------|--------|
|      | mean                     | 10%ile | 90%ile | mean                      | 10%ile | 90%ile |
| TI0  | 1.00                     | 1.00   | 1.00   | -0.40                     | -0.78  | -0.01  |
| TI1  | 0.60                     | 0.48   | 0.71   | -0.17                     | -0.40  | 0.08   |
| TI2  | 0.28                     | 0.17   | 0.40   | -0.07                     | -0.18  | 0.05   |
| TI3  | 0.11                     | 0.00   | 0.21   | -0.02                     | -0.09  | 0.04   |
| RHI0 | -0.40                    | -0.78  | -0.01  | 1.00                      | 1.00   | 1.00   |
| RHI1 | -0.21                    | -0.50  | 0.08   | 0.46                      | 0.34   | 0.59   |
| RHI2 | -0.12                    | -0.27  | 0.04   | 0.16                      | 0.06   | 0.28   |
| RHI3 | -0.06                    | -0.15  | 0.02   | 0.05                      | -0.02  | 0.12   |

Notes: Abbreviations: TI<sub>i</sub>=temperature lagged to i days, RH<sub>i</sub> = relative humidity lagged to i days, Correlations were partial with respect to time trends as modelled in the epidemiological study.

Figure S1: Detailed results replacing relative humidity by dewpoint or specific humidity

Figure S1: A) Detailed results replacing relative by dewpoint (DP)

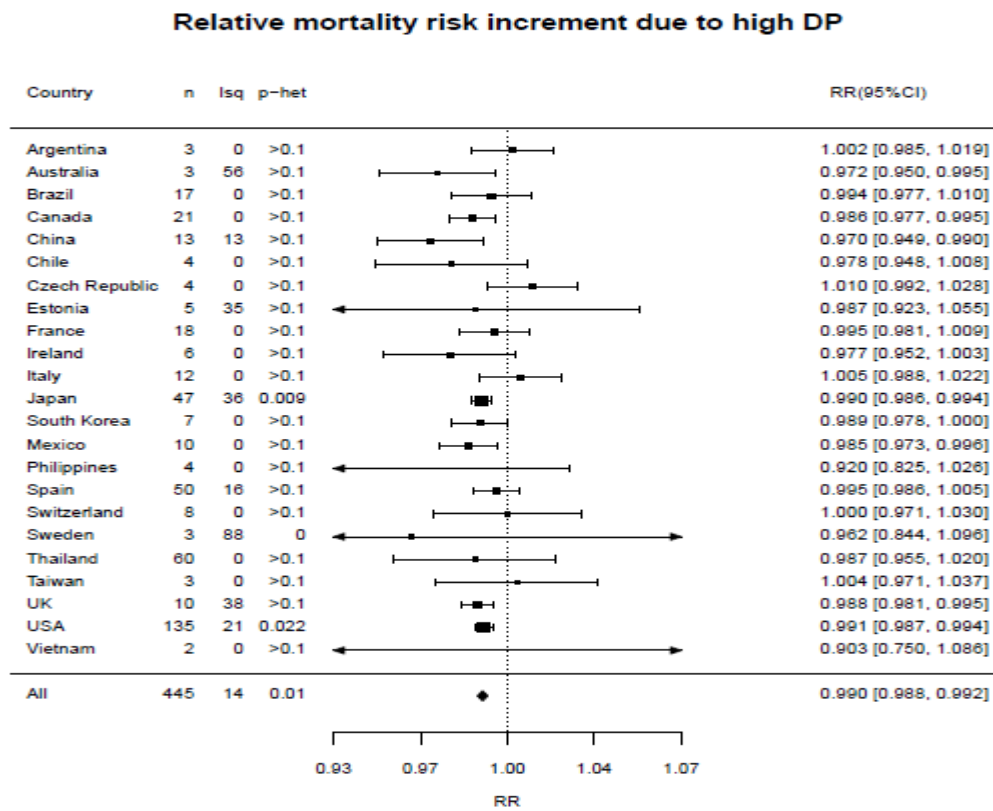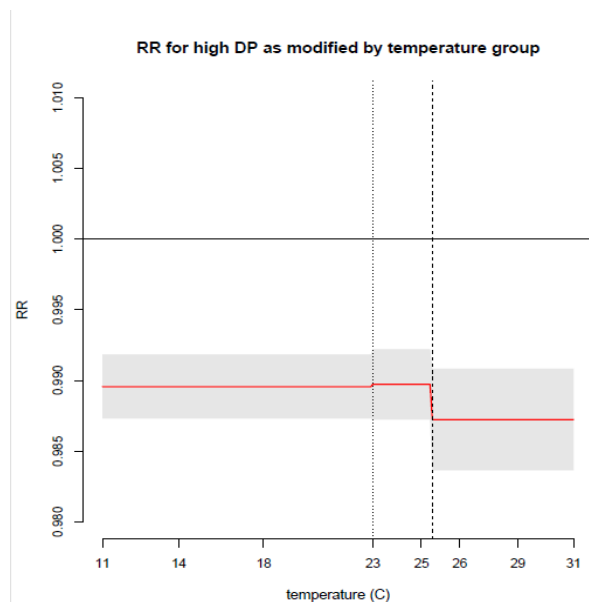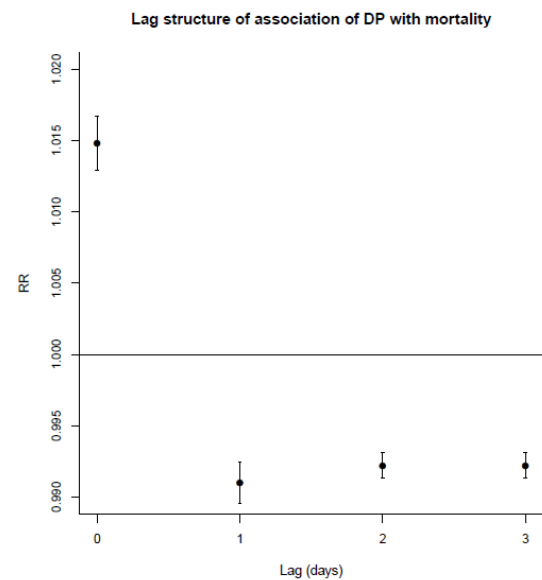

Notes: Abbreviations: DP=dewpoint, RR=rate ratio; Isq=  $I^2$ , the percentage of variation across studies that is due to true heterogeneity rather than chance; p-het is the p value for Cochran's test for heterogeneity between locations. RR is given for the 99<sup>th</sup> centile of DP anomaly: 5.2 deg C

Figure S1: B) Detailed results replacing relative by specific humidity (SH)

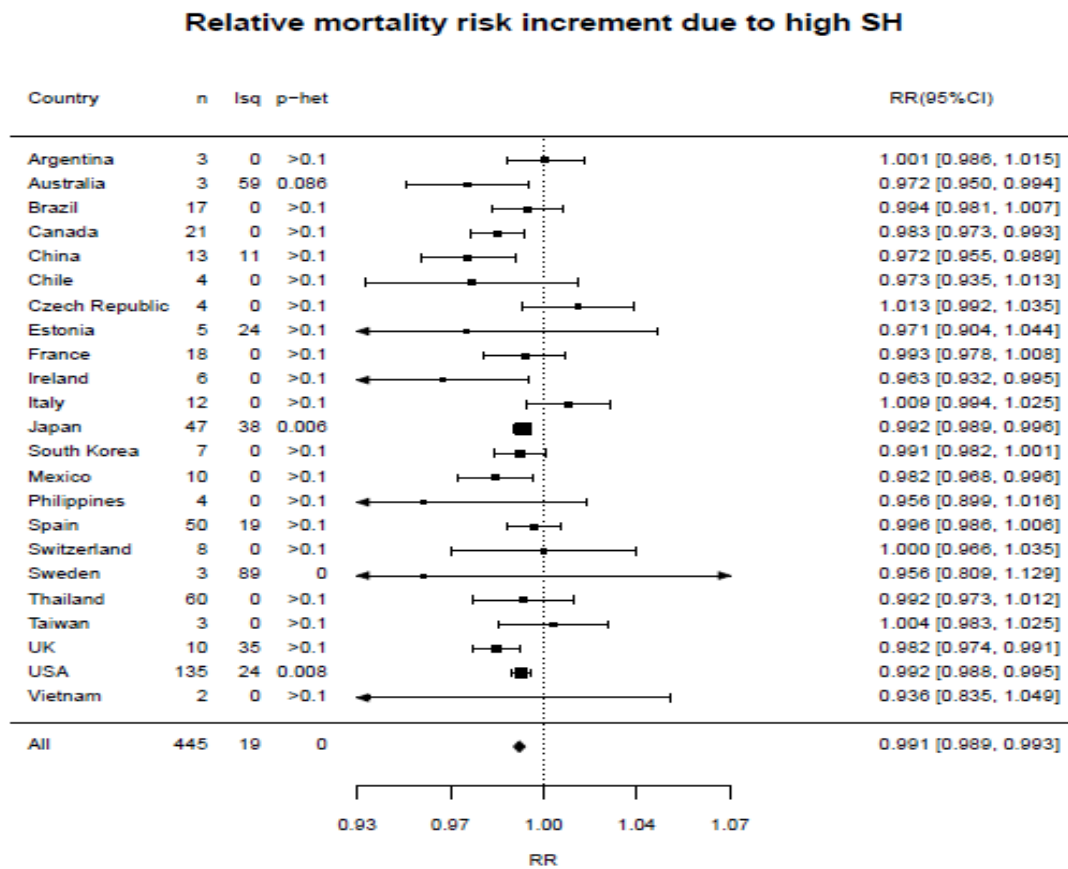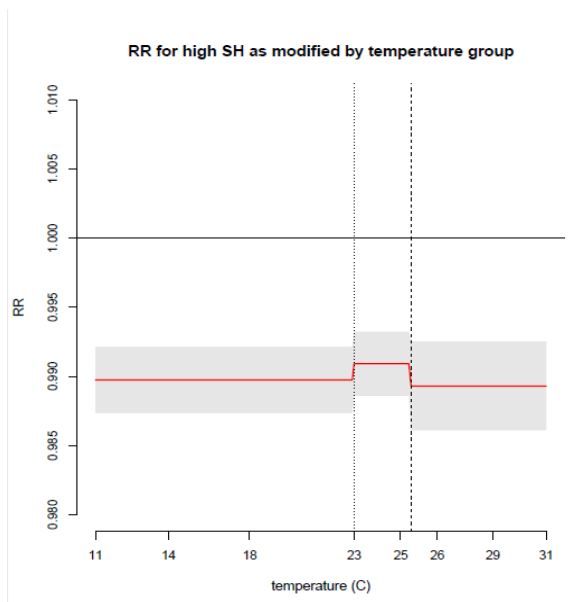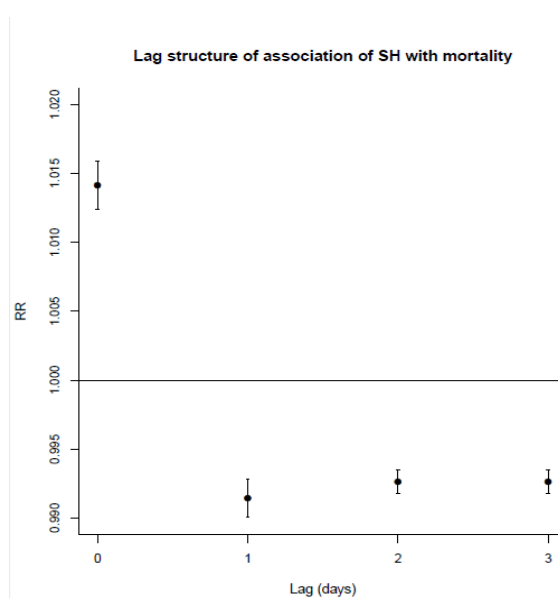

Note: Abbreviations: SH=Specific Humidity, RR=rate ratio; Isq=  $I^2$ , the percentage of variation across studies that is due to true heterogeneity rather than chance; p-het is the p value for Cochran's test for heterogeneity between locations. RR is given for the 99<sup>th</sup> centile of SH anomaly: 3.6 g/kg.

Figure S2: Modification of Relative humidity (RH)-mortality association by temperature

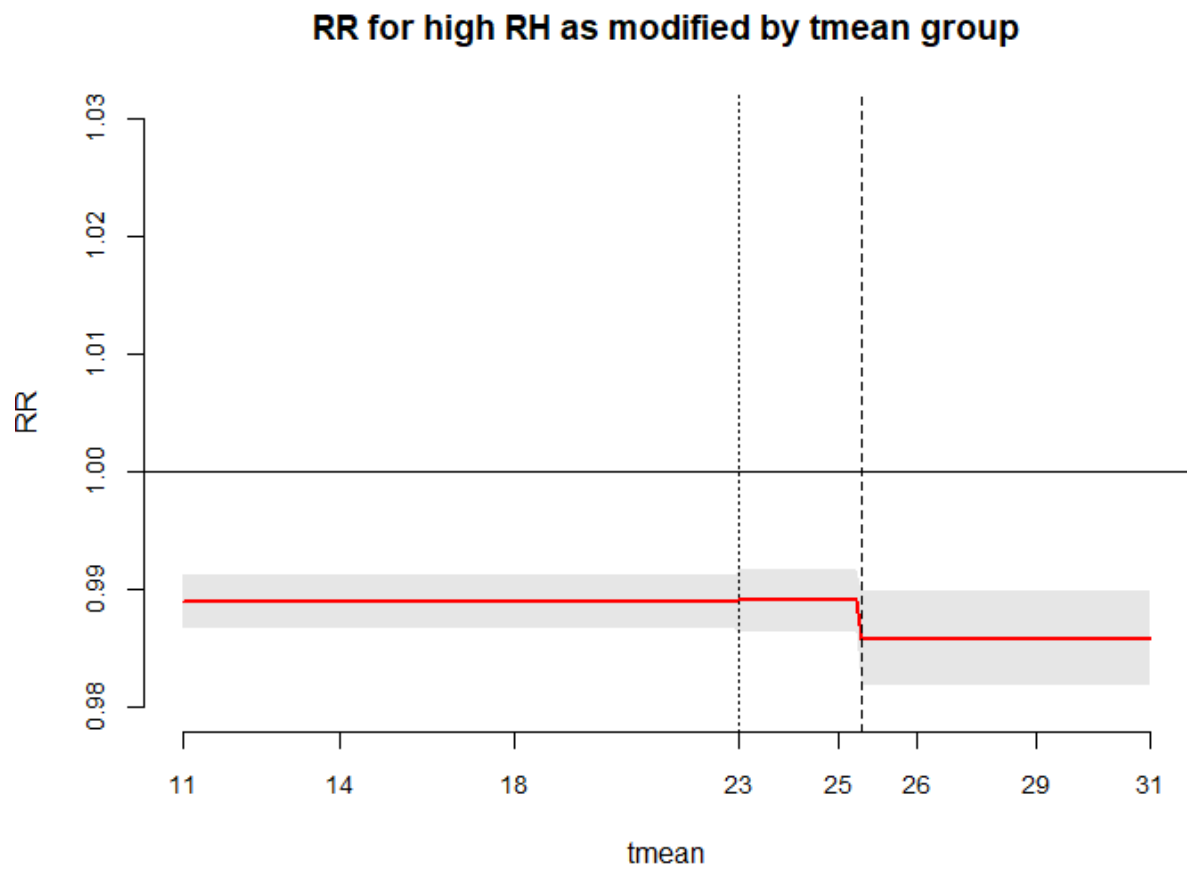

Notes: RR=rate ratio; Significance of interaction:  $p > 0.10$ ;  $I^2 = 30.8\%$ ,  $p\text{-het} < 0.001$

Figure S3: Mean temperature-mortality association adjusting for relative humidity (RH)

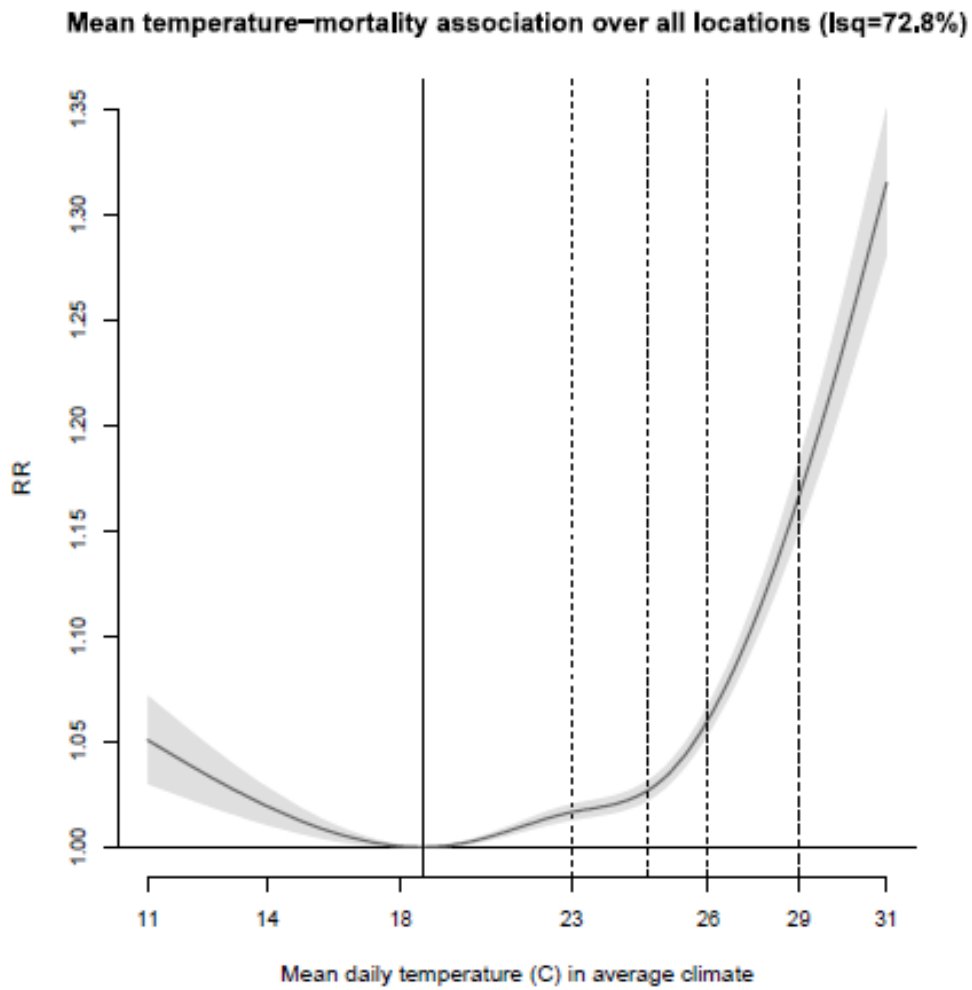

Note: Abbreviations: RR=rate ratio; I<sup>2</sup>, the percentage of variation across studies that is due to true heterogeneity rather than chance.
