# Supplementary material
Source: PubMed Central journal article supplement (PMC6792461)
Supplement: ehp-127-097007-s003.pdf [file ehp-127-097007-s003.pdf]

**Note to readers with disabilities:** *EHP* strives to ensure that all journal content is accessible to all readers. However, some figures and Supplemental Material published in *EHP* articles may not conform to [508 standards](#) due to the complexity of the information being presented. If you need assistance accessing journal content, please contact [ehp508@niehs.nih.gov](mailto:ehp508@niehs.nih.gov). Our staff will work with you to assess and meet your accessibility needs within 3 working days.

### **Supplemental Material**

#### **The Role of Humidity in Associations of High Temperature with Mortality: A Multiauthor, Multicity Study**

Ben Armstrong, Francesco Sera, Ana Maria Vicedo-Cabrera, Rosana Abrutzky, Daniel Oudin Åström, Michelle L. Bell, Bing-Yu Chen, Micheline de Sousa Zanotti Stagliorio Coelho, Patricia Matus Correa, Tran Ngoc Dang, Magali Hurtado Diaz, Do Van Dung, Bertil Forsberg, Patrick Goodman, Yue-Liang Leon Guo, Yuming Guo, Masahiro Hashizume, Yasushi Honda, Ene Indermitte, Carmen Íñiguez, Haidong Kan, Ho Kim, Jan Kyselý, Eric Lavigne, Paola Michelozzi, Hans Orru, Nicolás Valdés Ortega, Mathilde Pascal, Martina S. Ragetti, Paulo Hilario Nascimento Saldiva, Joel Schwartz, Matteo Scortichini, Xerxes Seposo, Aurelio Tobias, Shilu Tong, Aleš Urban, César De la Cruz Valencia, Antonella Zanobetti, Ariana Zeka, and Antonio Gasparrini

#### **Table of Contents**

**Table S1.** Summary of data sources.

**Table S2.** Distribution of key variables by country: including dewpoint and specific humidity.

**Table S3.** Distribution of key variables by location.

**Table S4.** Further detail of model fit statistics summarised on Figure 1.

**Table S5.** Distribution of same and cross-lag correlations of daily temperature (T) and relative humidity (RH) measurements.

**Figure S1.** Detailed results replacing relative humidity by dewpoint or specific humidity.

**Figure S2.** Modification of Relative humidity (RH)-mortality association by temperature.

**Figure S3.** Mean temperature-mortality association adjusting for relative humidity (RH).

**Additional File-** SupplementalMaterial\_CodeAndData.zip
